# Supplementary material
Source: PubMed Central journal article supplement (PMC6309456)
Supplement: NIHMS997214-supplement-Supplemental.pdf [file NIHMS997214-supplement-Supplemental.pdf]

# **Anthranilic Acid (AA) as a Versatile Fluorescent Tag and Linker for Functional Glycomics**

Yuyang Zhu<sup>1</sup>, Xueyun Liu<sup>1</sup>, Ying Zhang<sup>1,2</sup>, Zhongfu Wang<sup>2</sup>, Yi Lasanajak<sup>1</sup>, and Xuezheng Song<sup>1,\*</sup>

<sup>1</sup>Department of Biochemistry, Emory Comprehensive Glycomics Core, Emory University School of Medicine, Atlanta, GA, USA 30322; <sup>2</sup>Educational Ministry Key Laboratory of Resource Biology and Biotechnology in Western China, College of Life Science, Northwest University, Xi'an 710069, P. R. China, \* Email: [xsong2@emory.edu](mailto:xsong2@emory.edu)

## **Supporting Information**

**Figure S1:** Summary of HPLC profiles of chicken egg N-glycan AA conjugates

WAX Separation, Neutral Portion

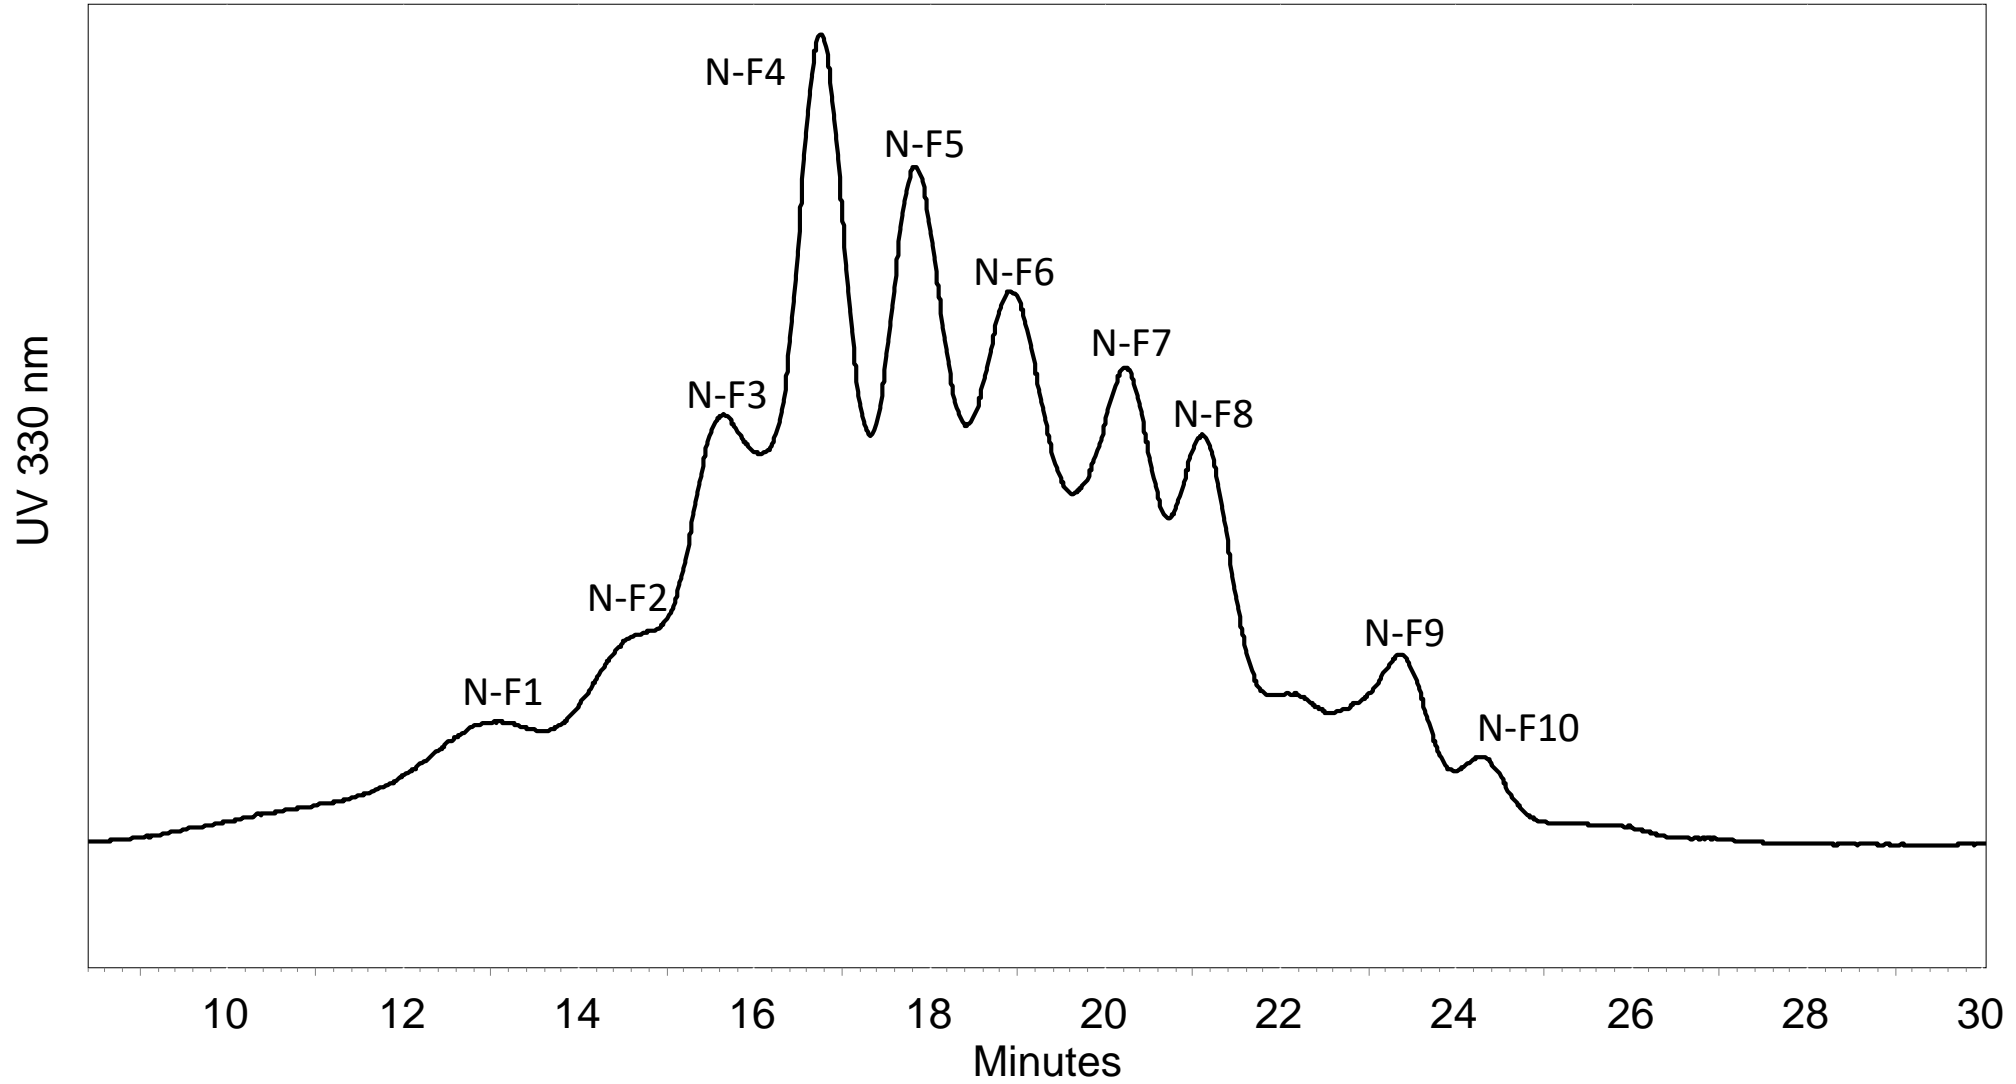

N-F1 from WAX HPLC, then C18 HPLC

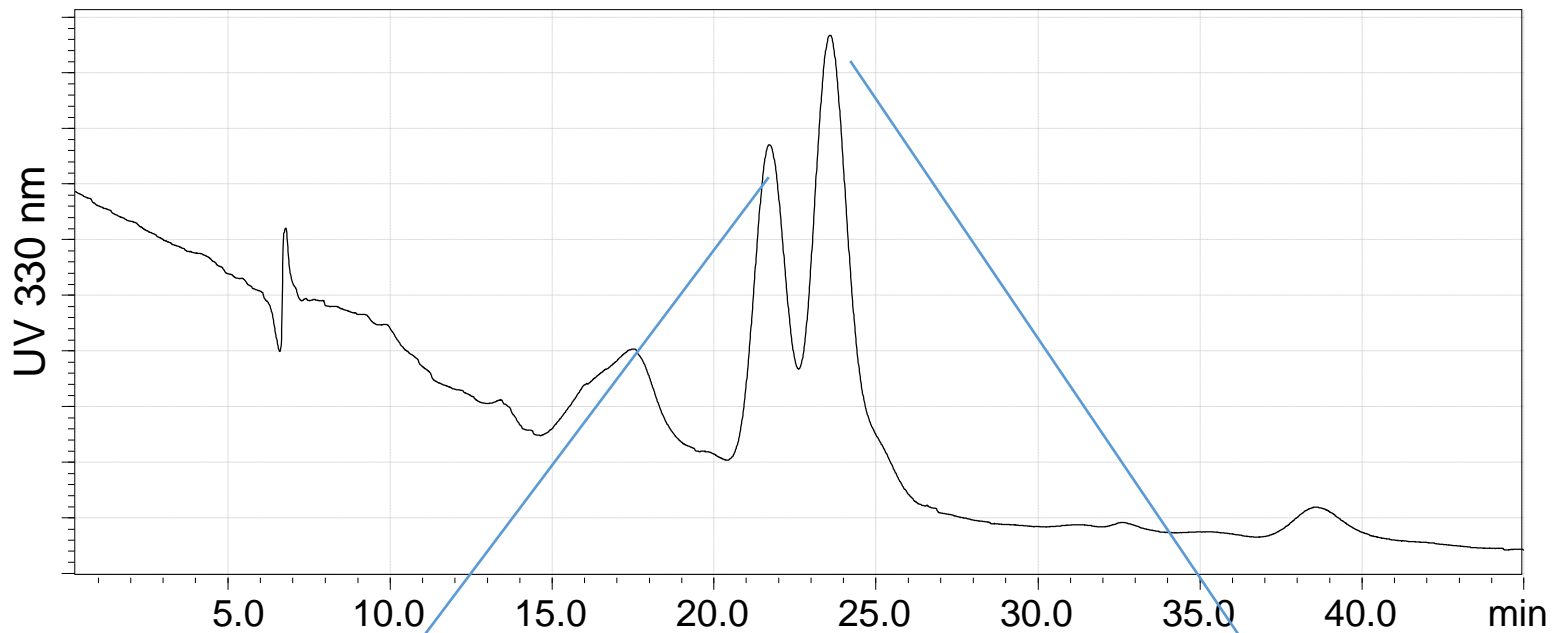

After C18 , then amino HPLC separation

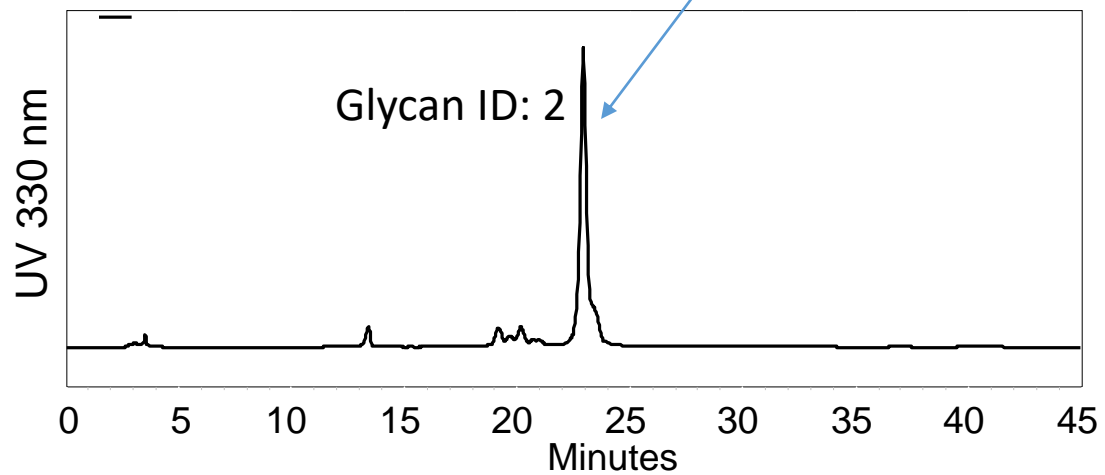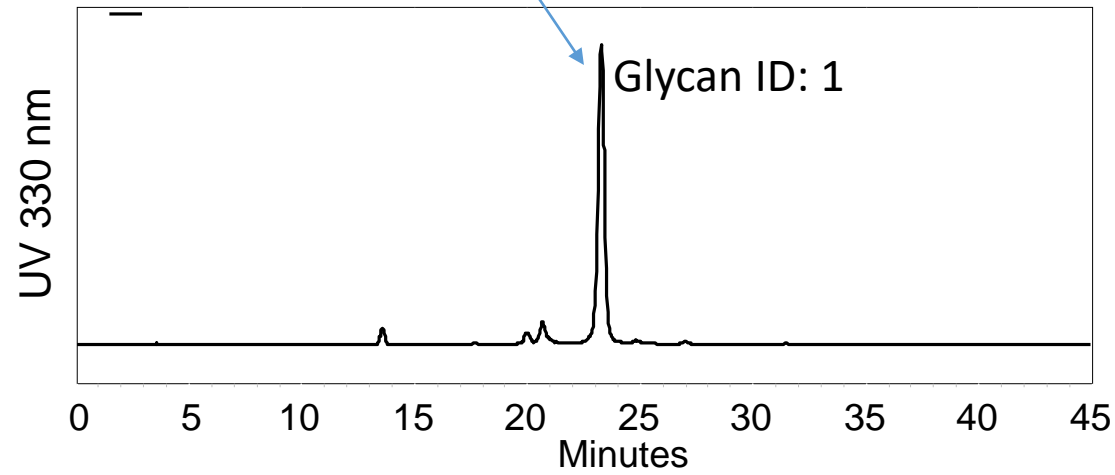

# N-F2 from WAX HPLC, then C18 HPLC

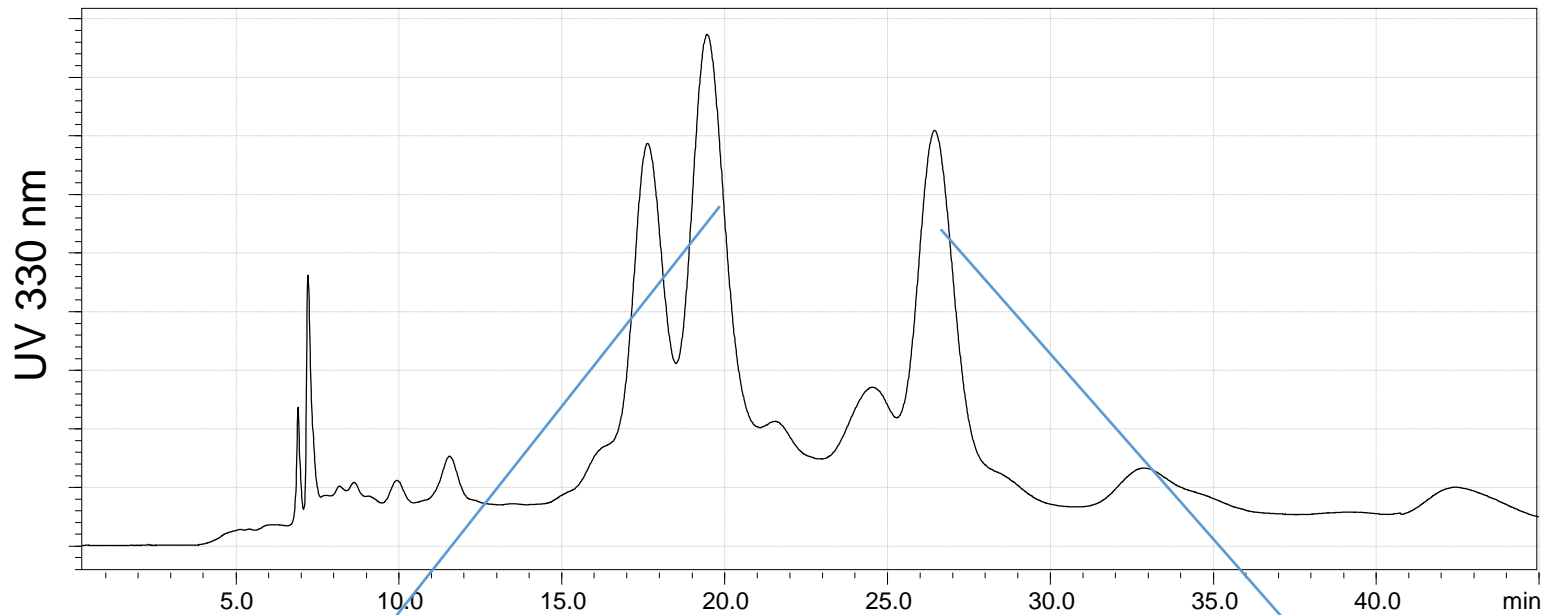

## After C18 , then amino HPLC separation

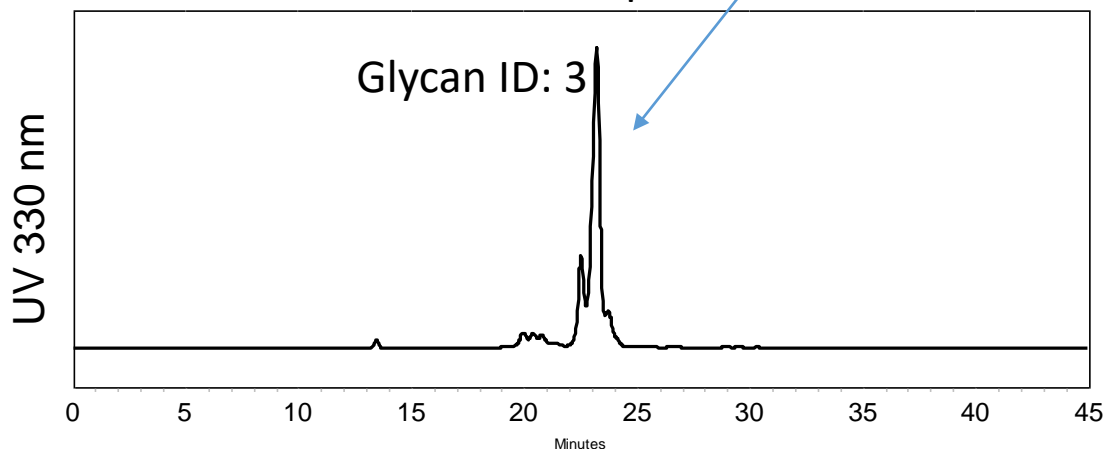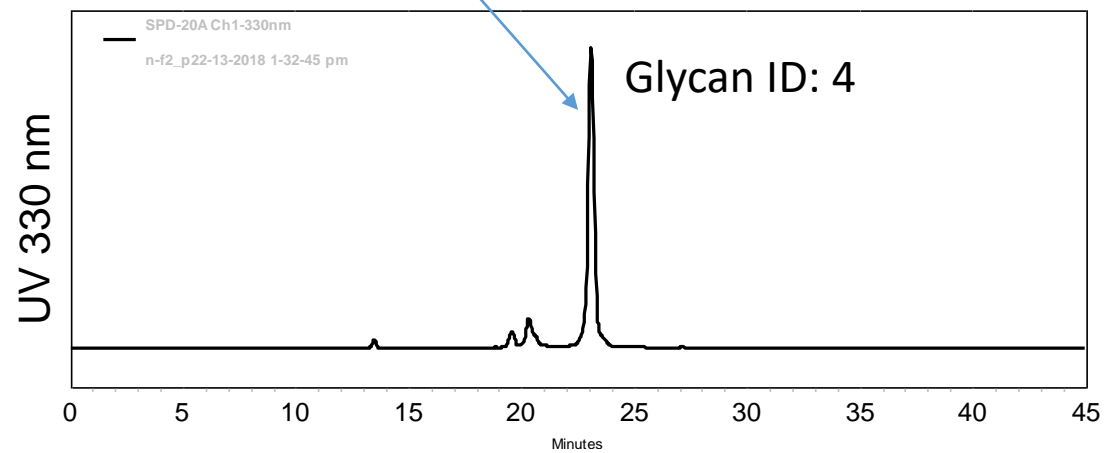

# N-F3 from WAX HPLC, then C18 HPLC

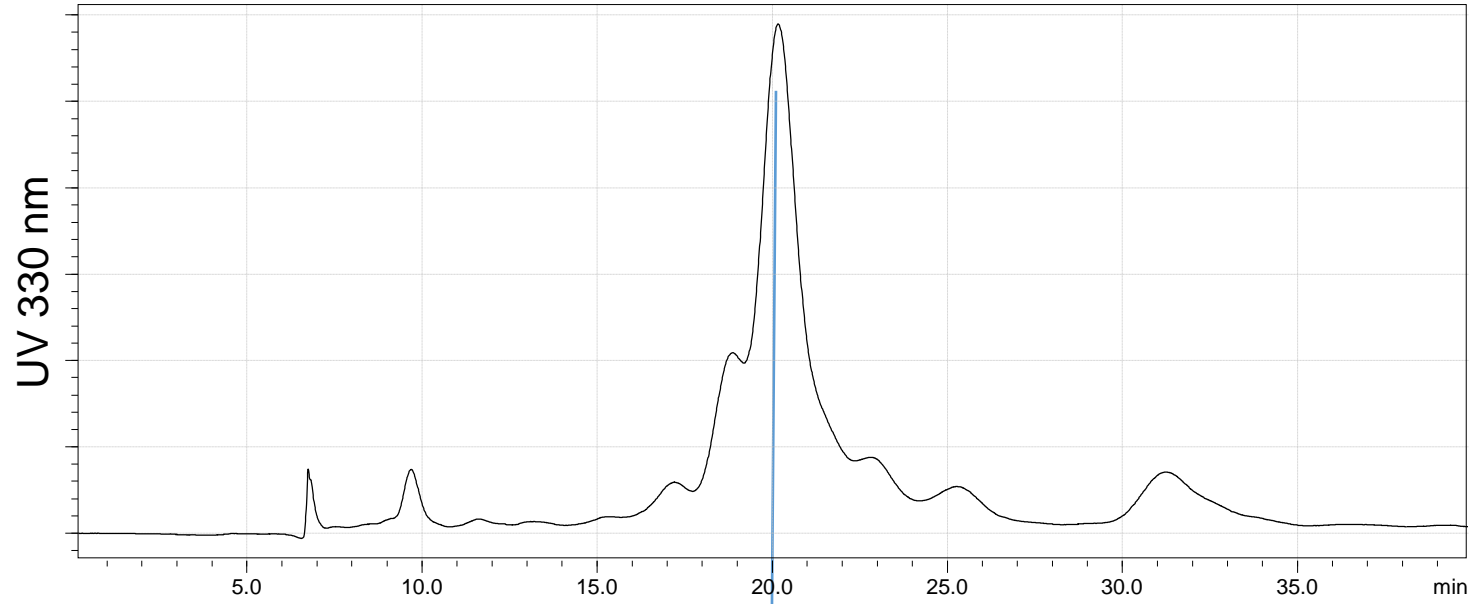

After C18 , then amino HPLC separation

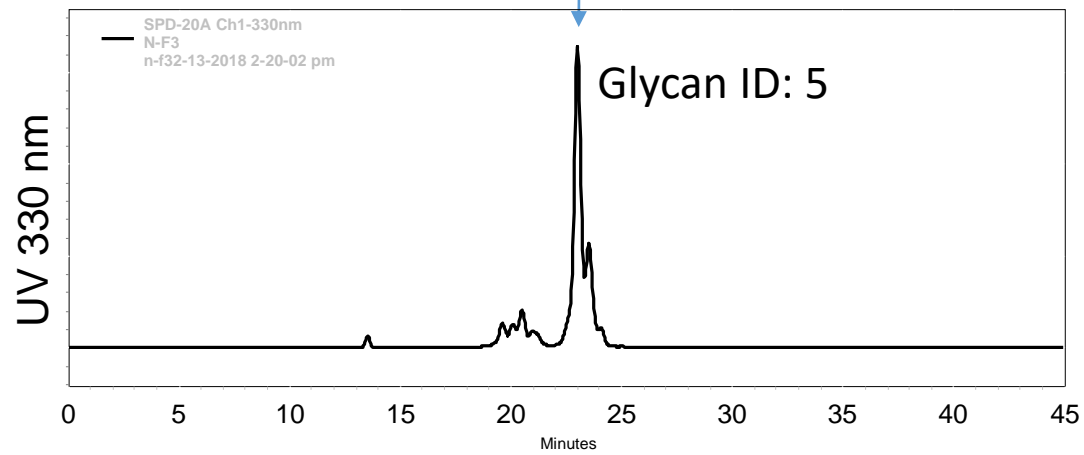

# F4 from WAX HPLC, then C18 HPLC

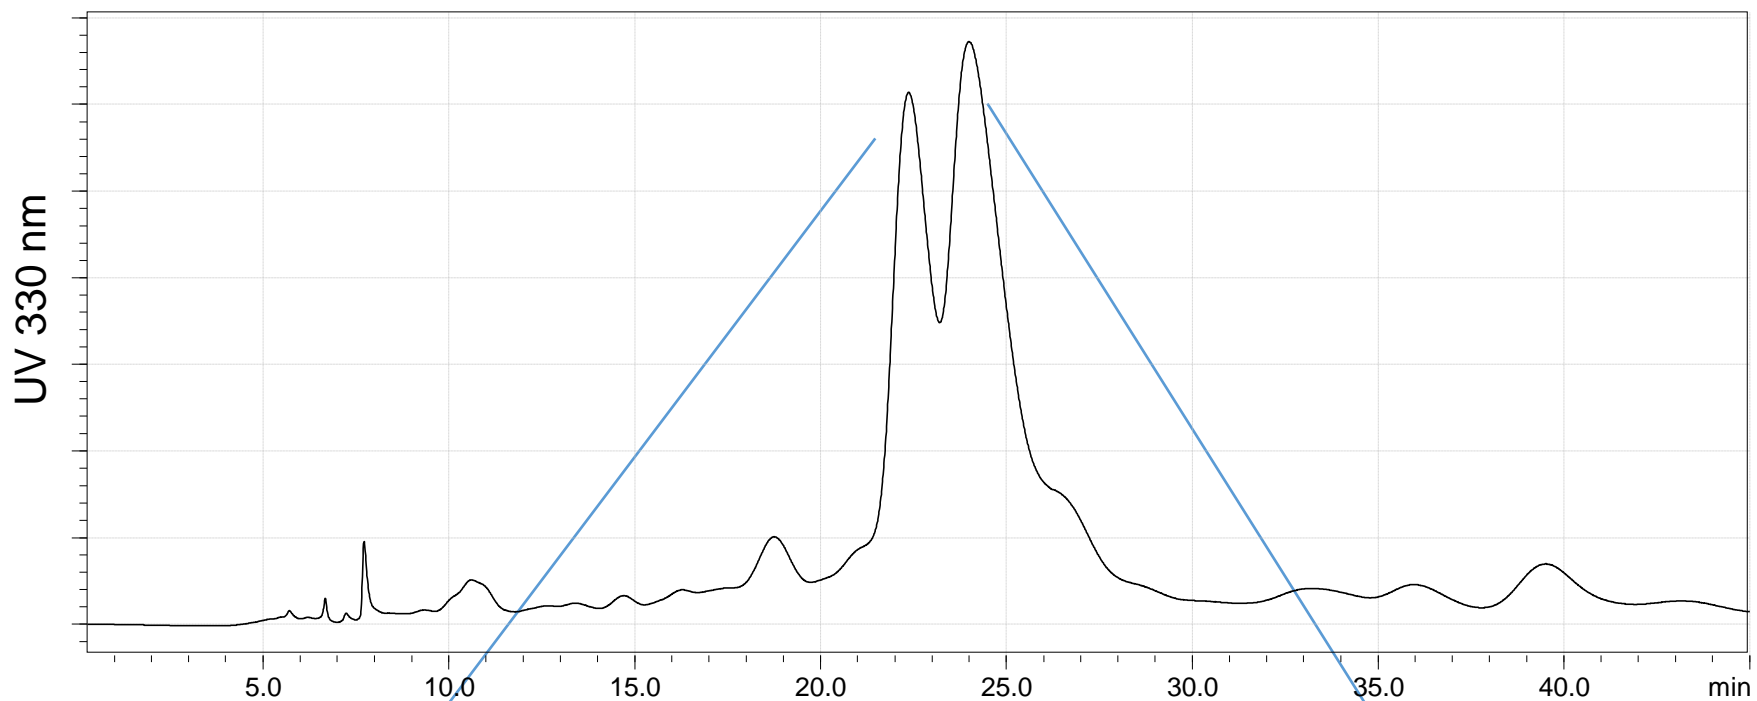

## After C18 , then amino HPLC separation

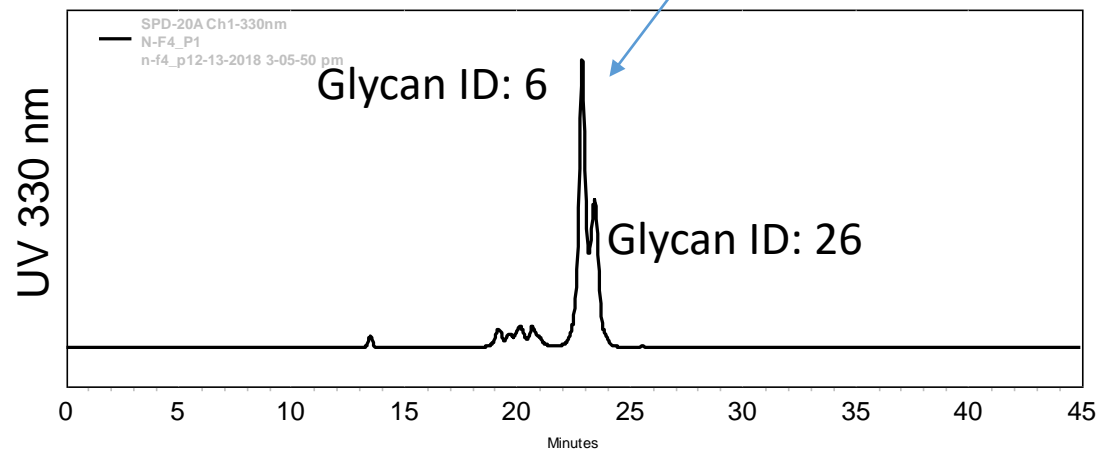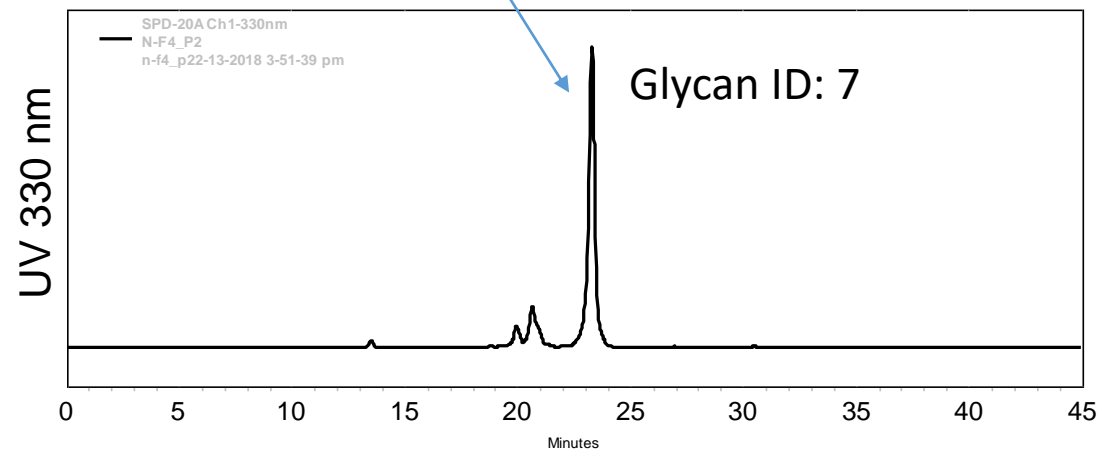

F5 from WAX HPLC, then C18 HPLC

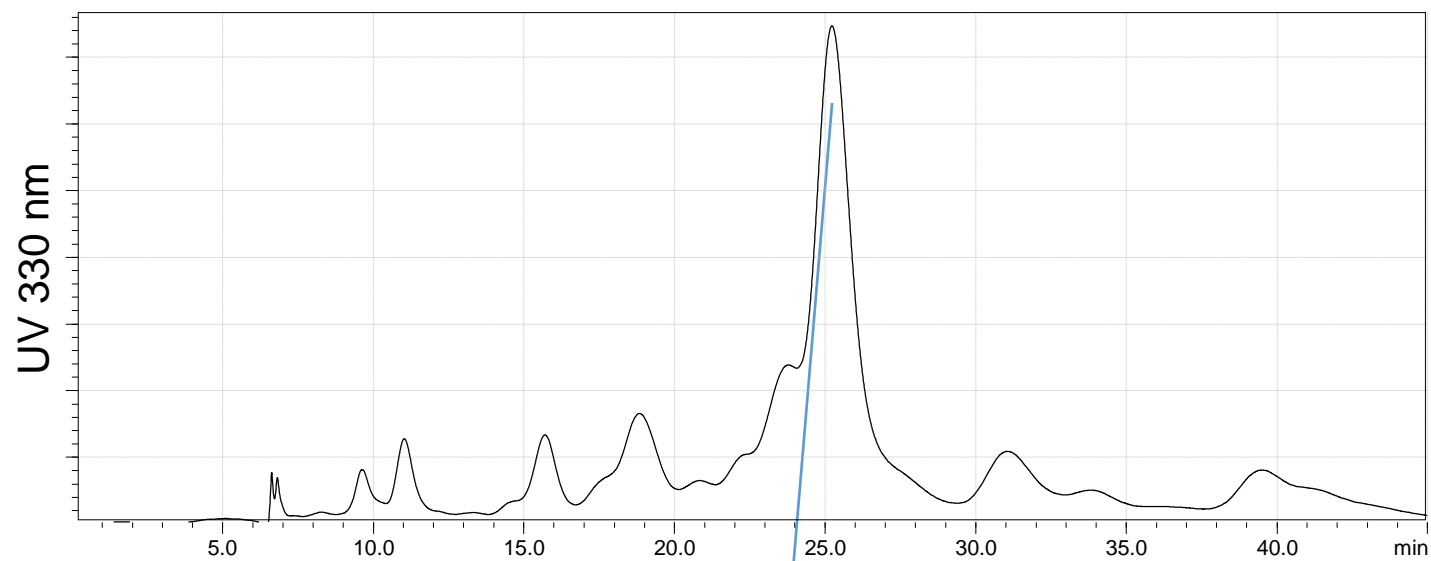

After C18 , then amino HPLC separation

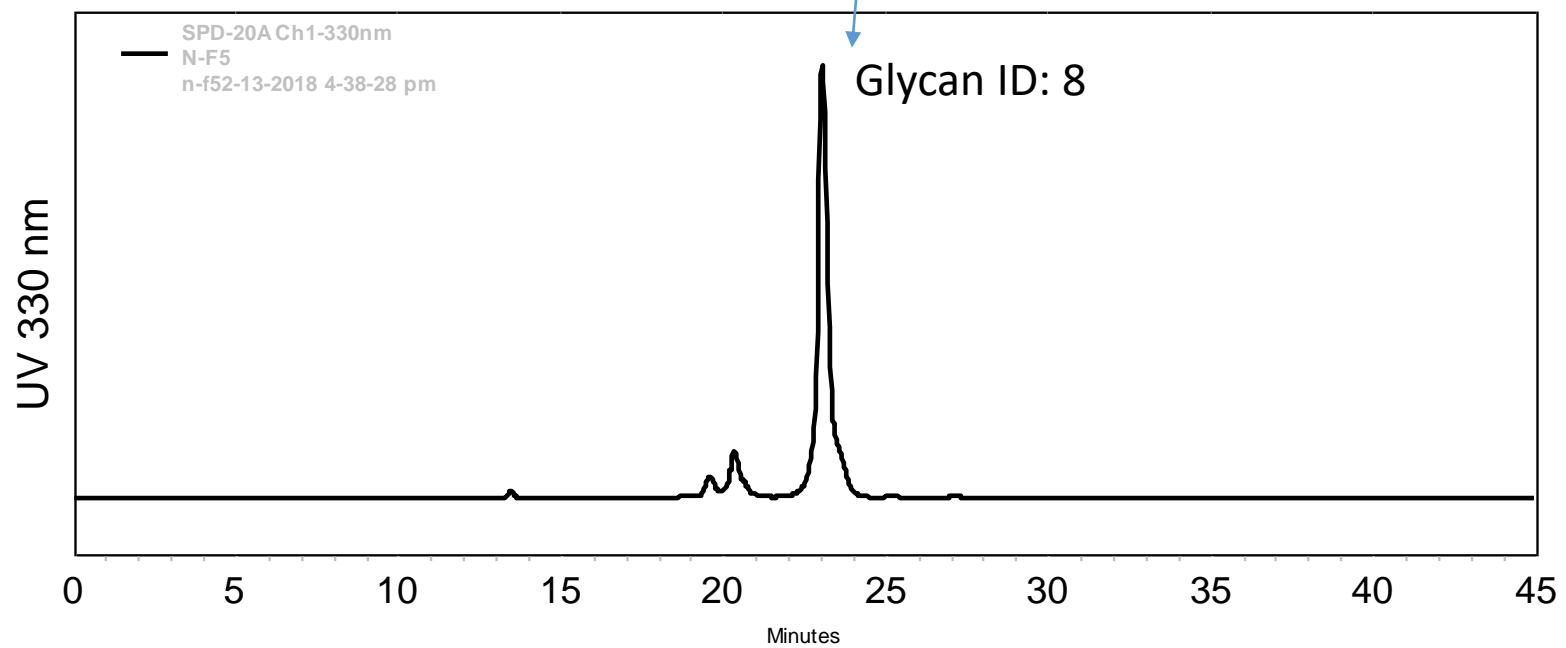

# N-F7 from WAX HPLC , then C18 HPLC

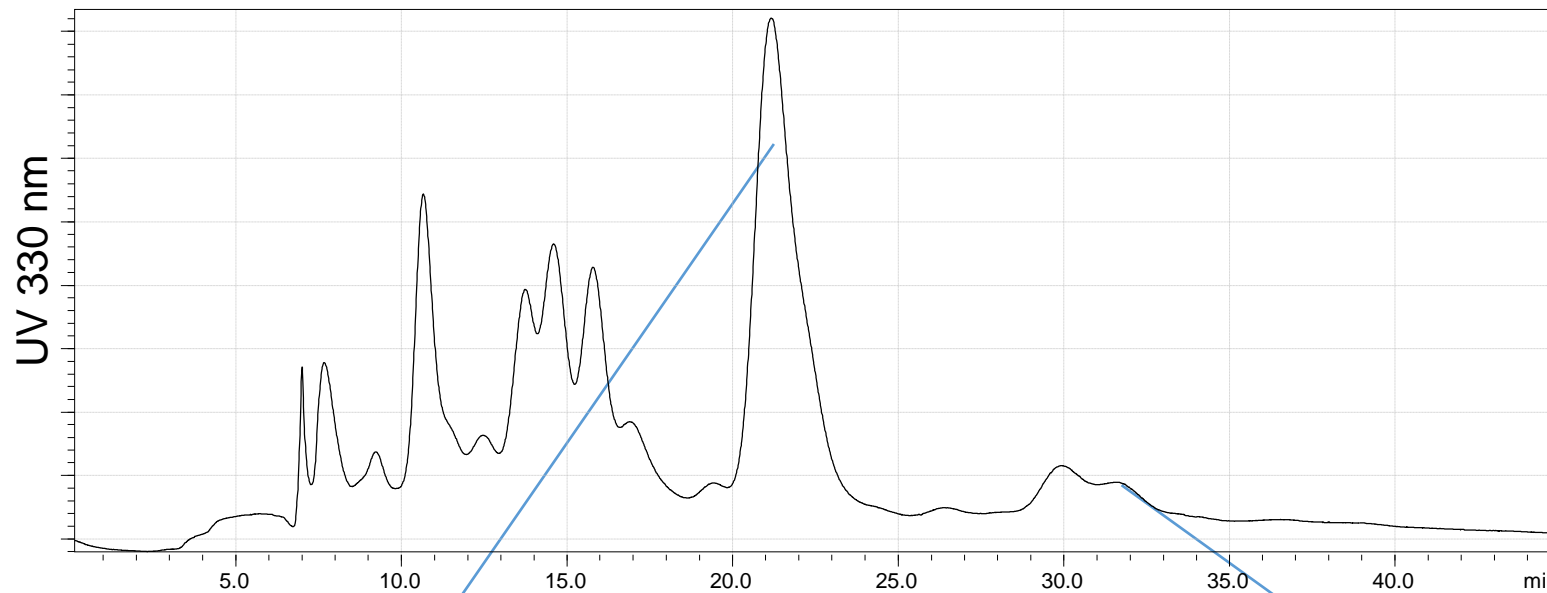

After C18 , then amino HPLC separation

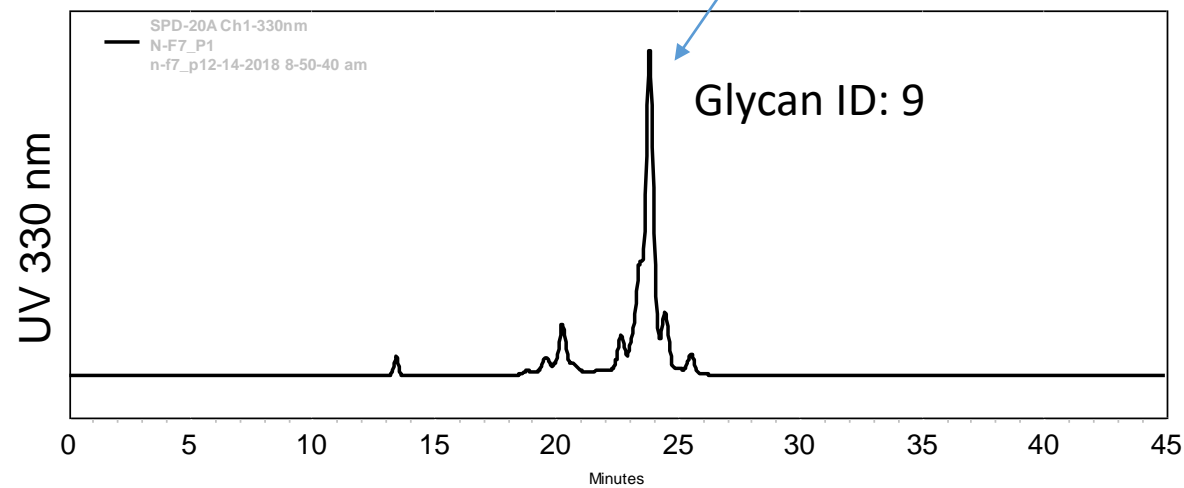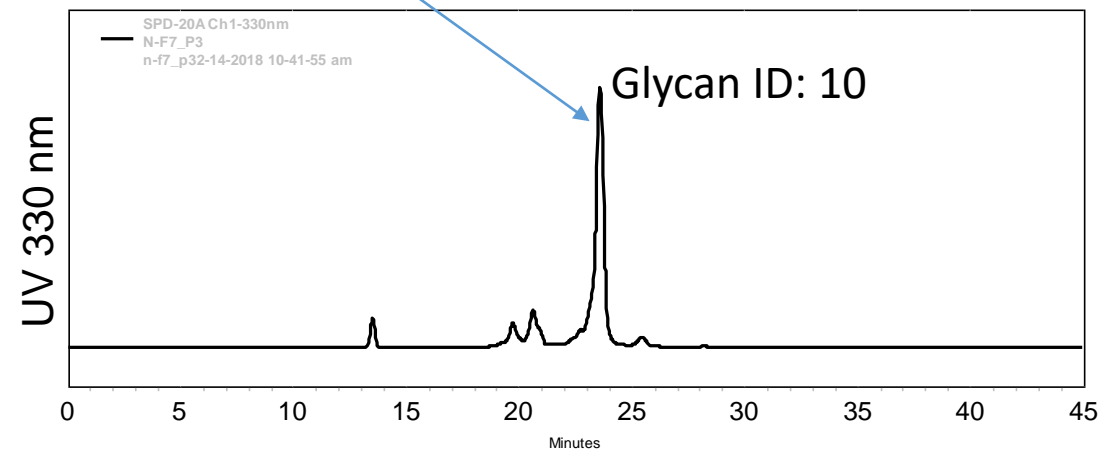



# N-F8 from WAX HPLC, then C18 HPLC

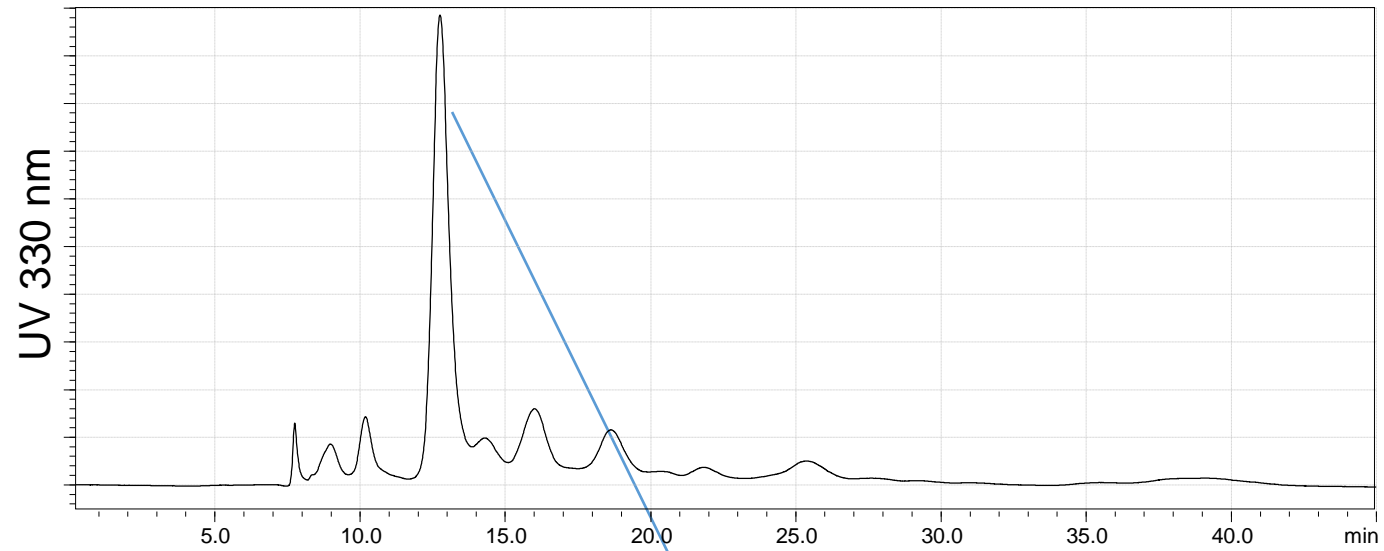

# After C18 , then amino HPLC separation

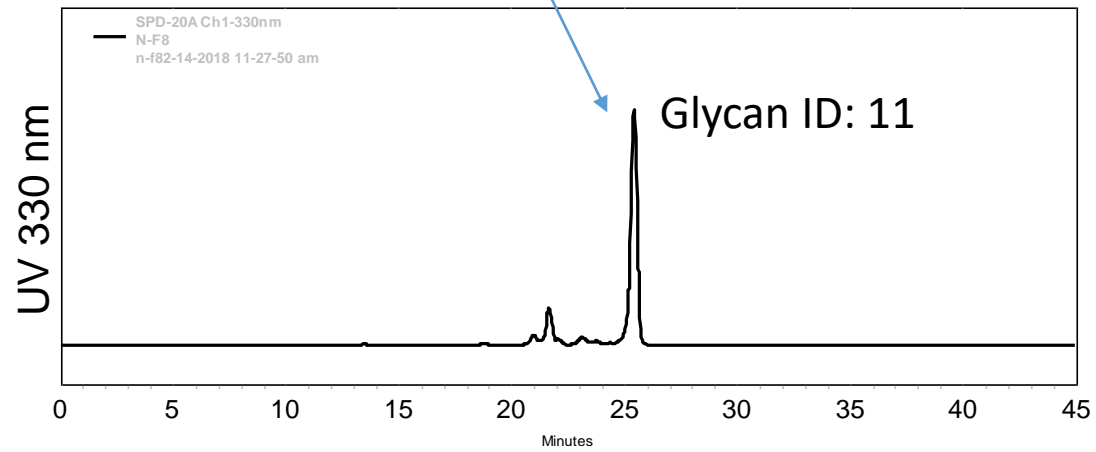

N-F9 from WAX HPLC , then C18 HPLC

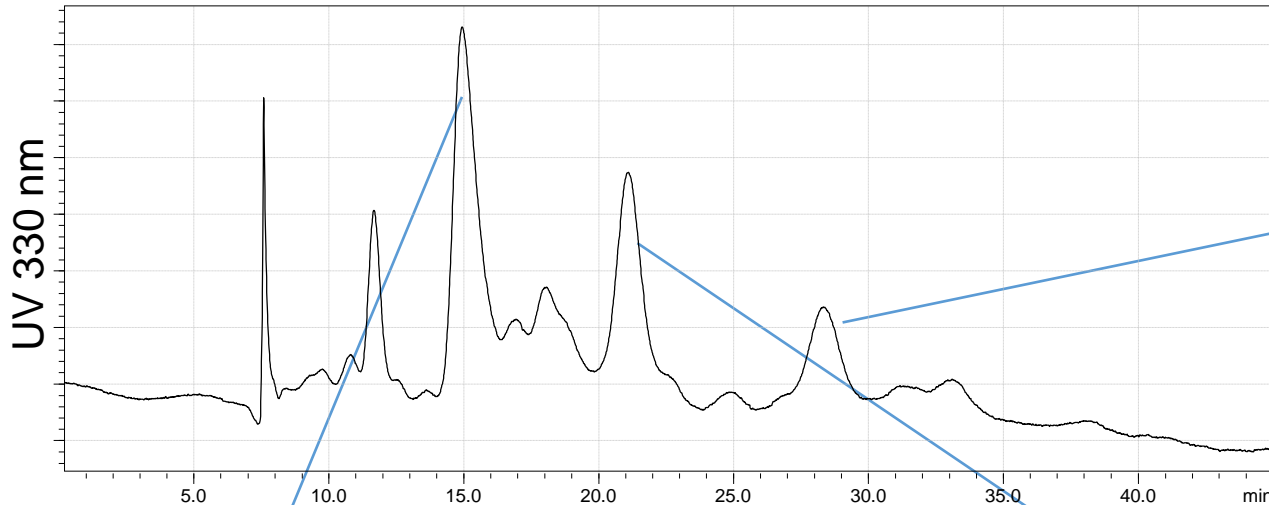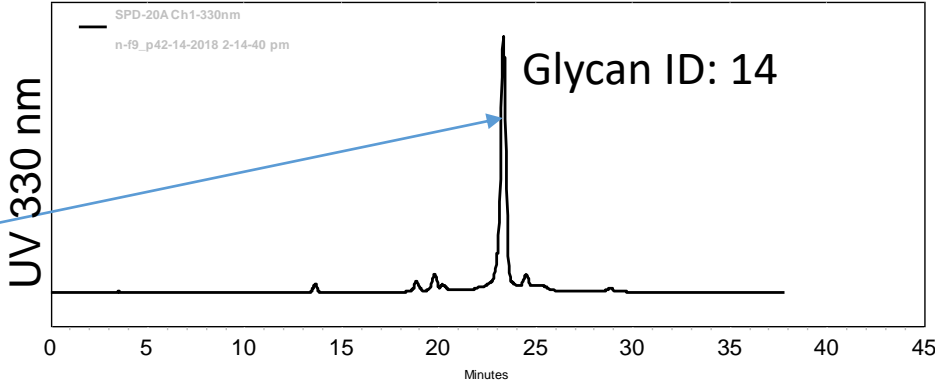

After C18 , then amino HPLC separation

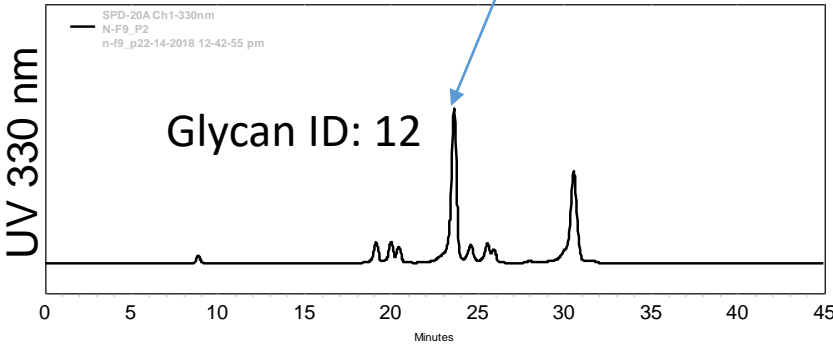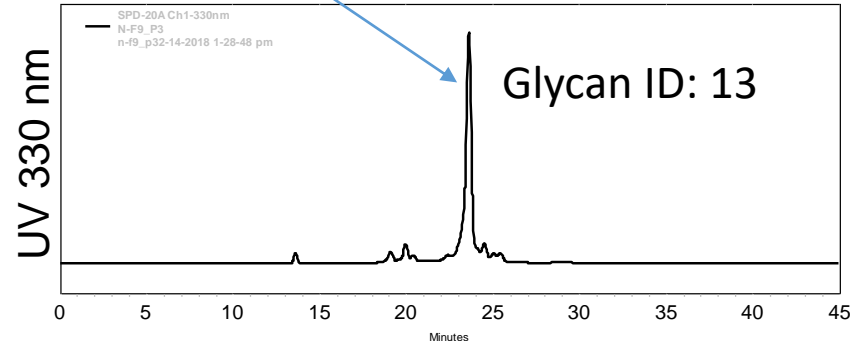

N-F10 from WAX HPLC, then C18 HPLC

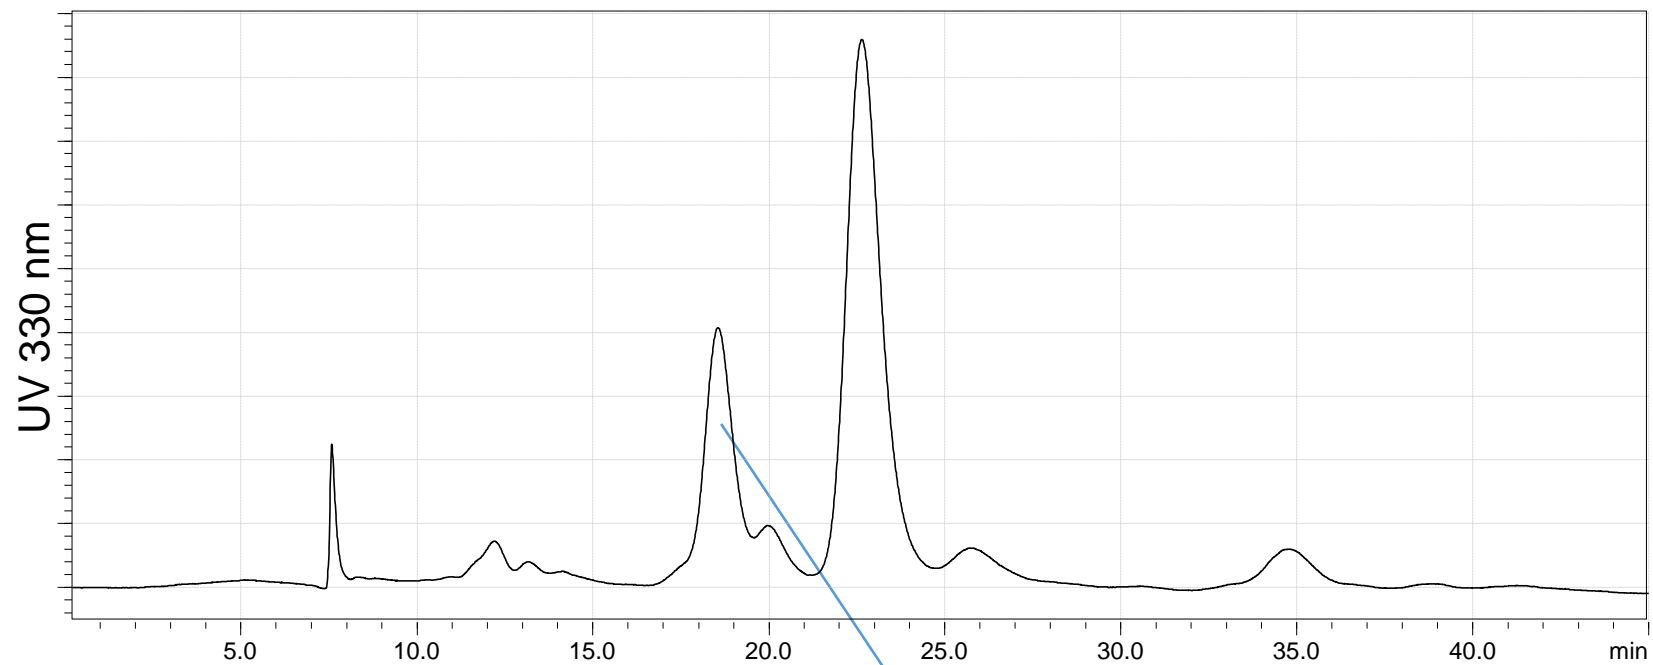

After C18 , then amino HPLC separation

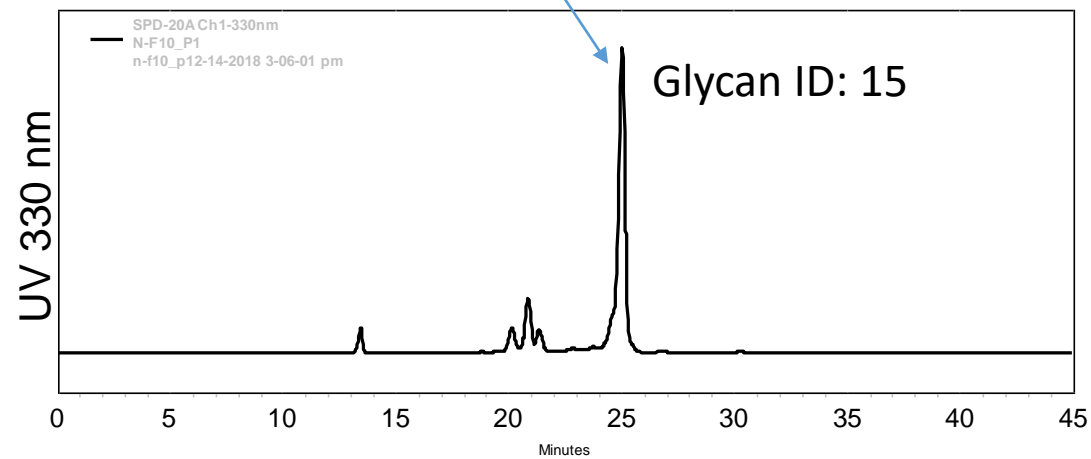

# WAX Separation, mono-sialic acids Portion

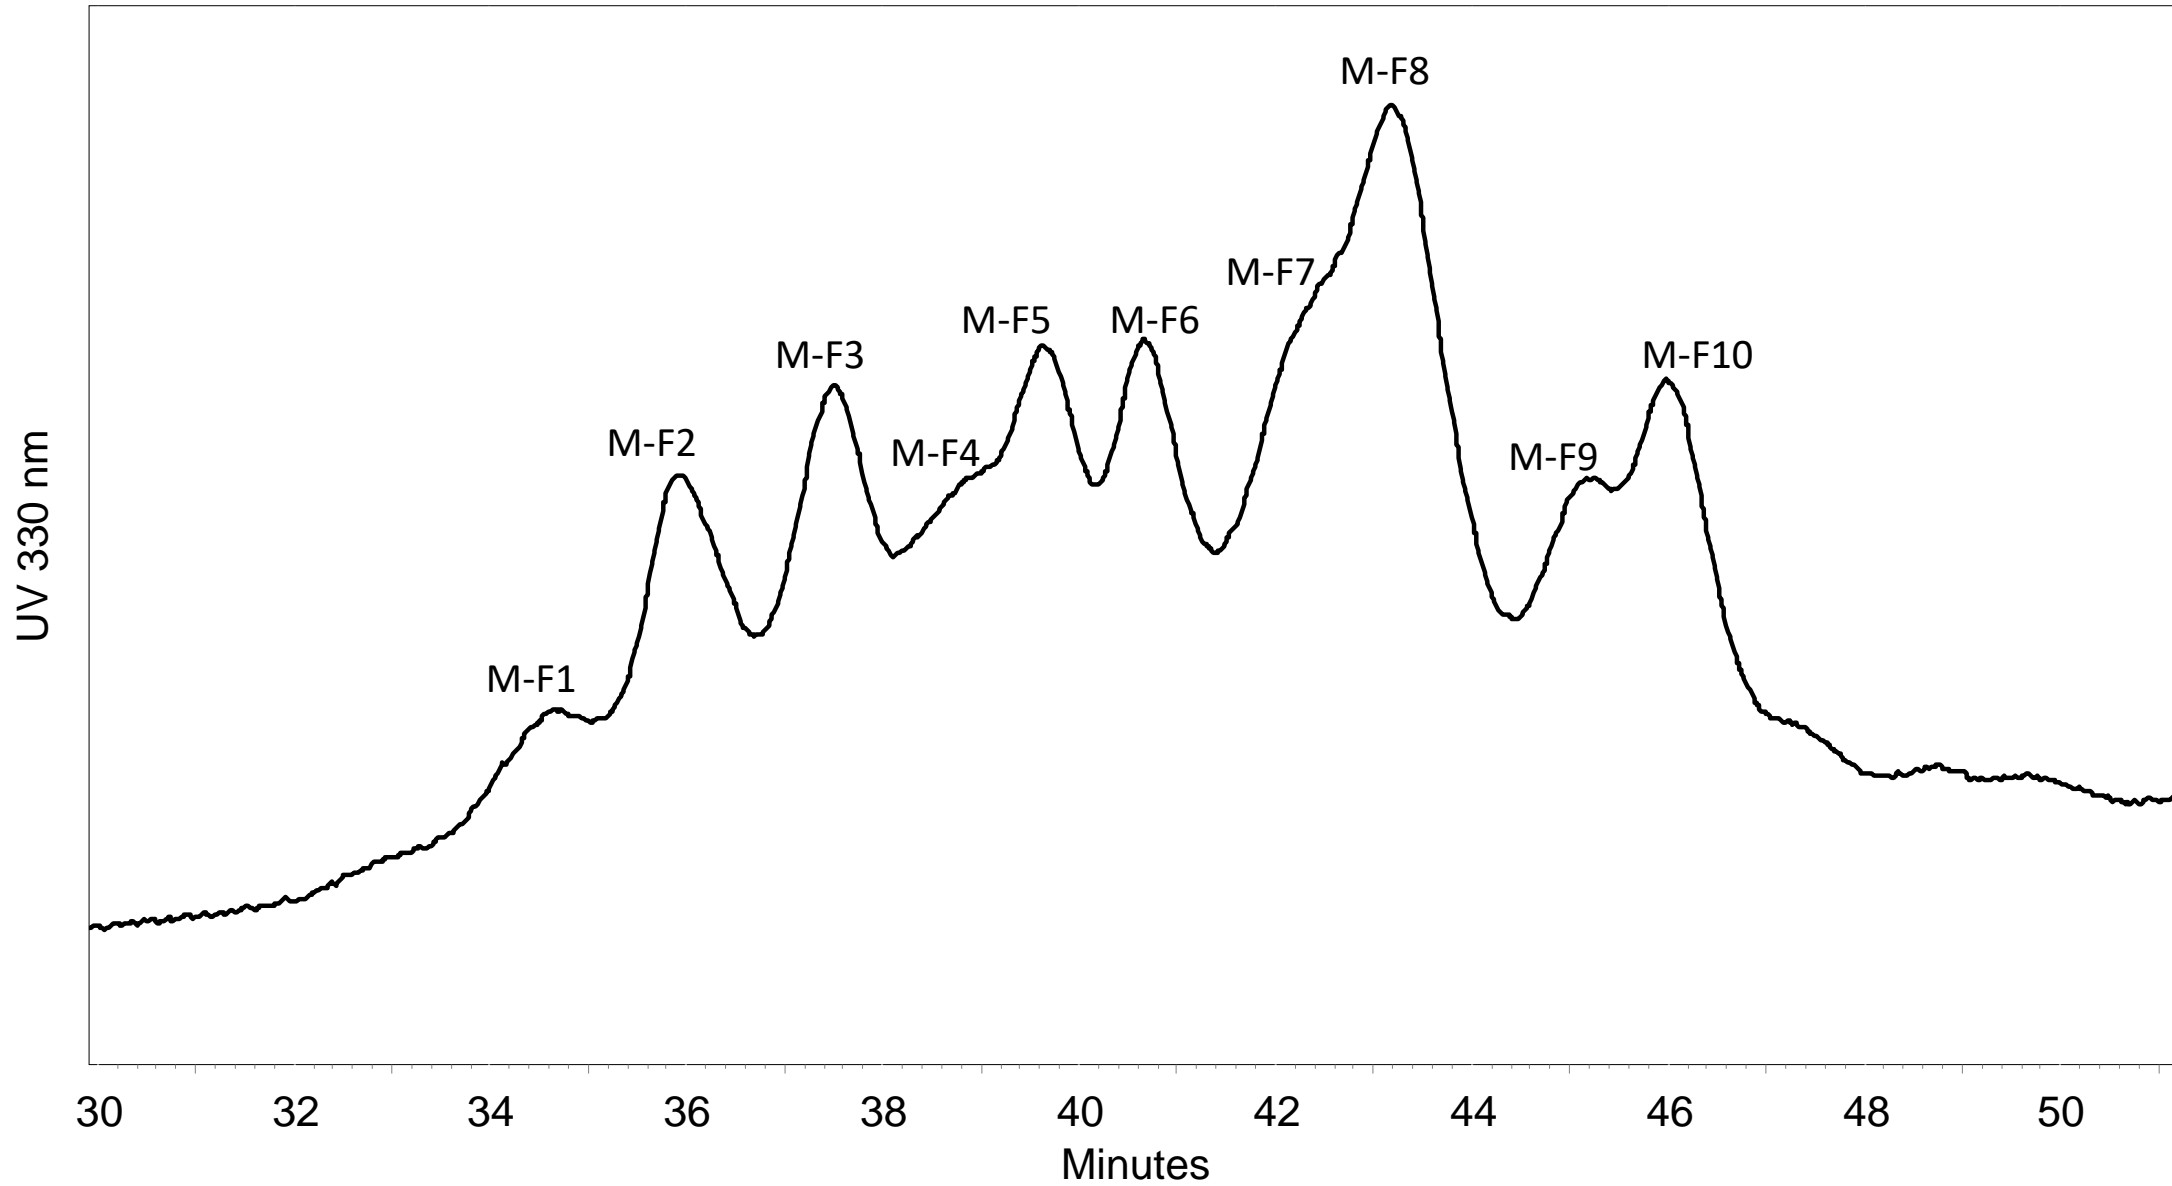

M-F3 from WAX HPLC, then C18 HPLC

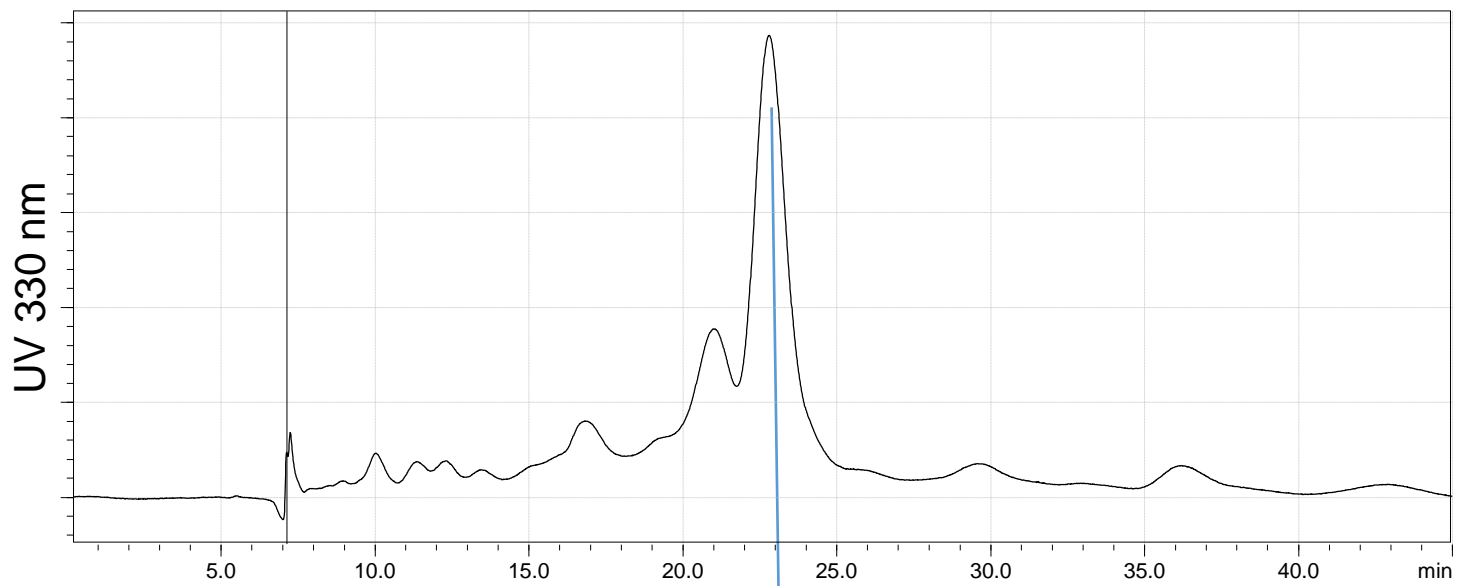

After C18 , then amino HPLC separation

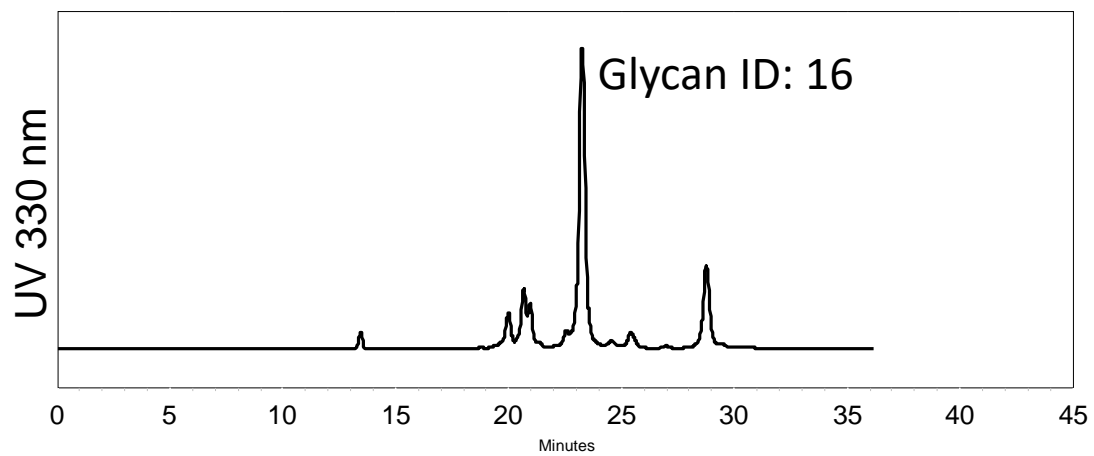

# M-F6 from WAX HPLC, then C18 HPLC

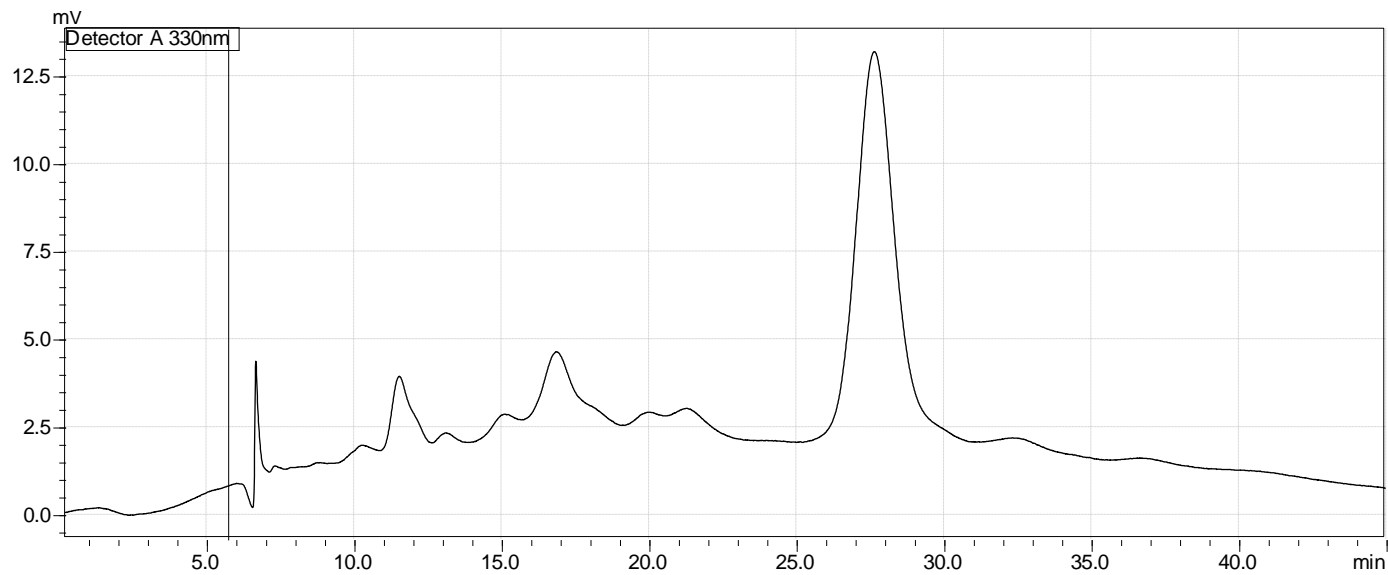

## After C18 , then amino HPLC separation

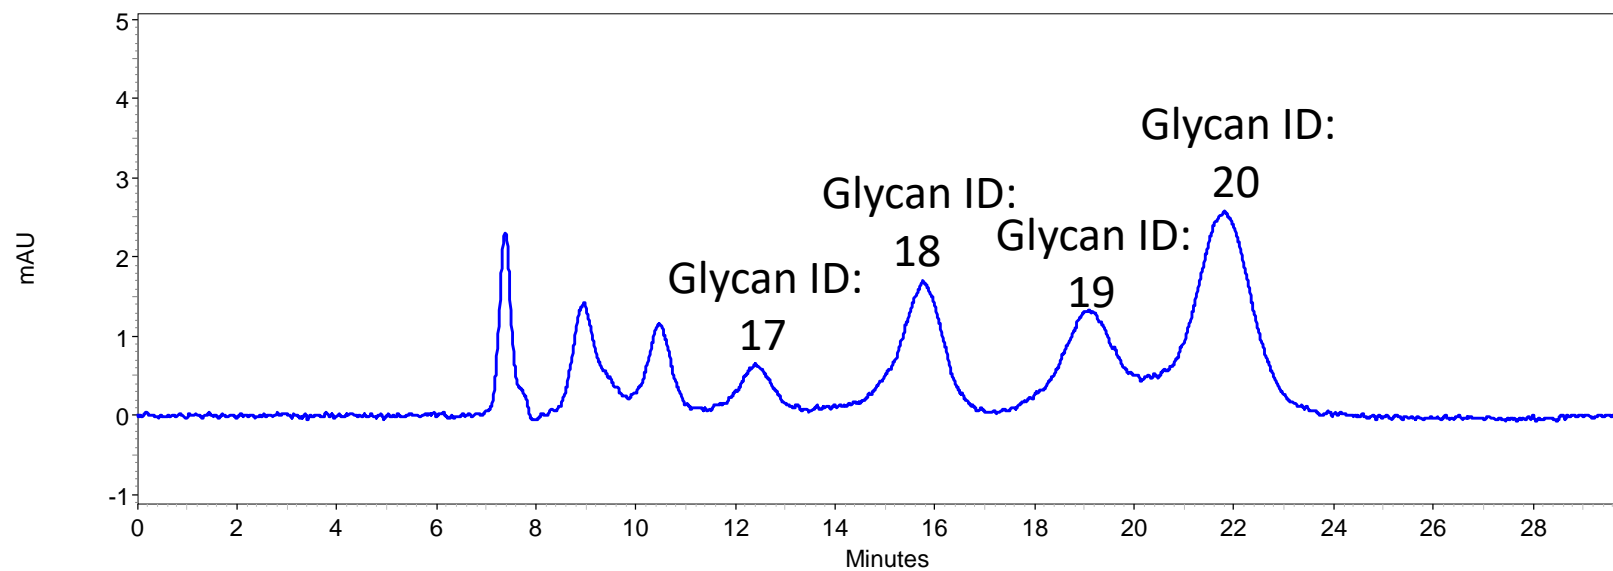

# M-F8 from WAX HPLC, then C18 HPLC

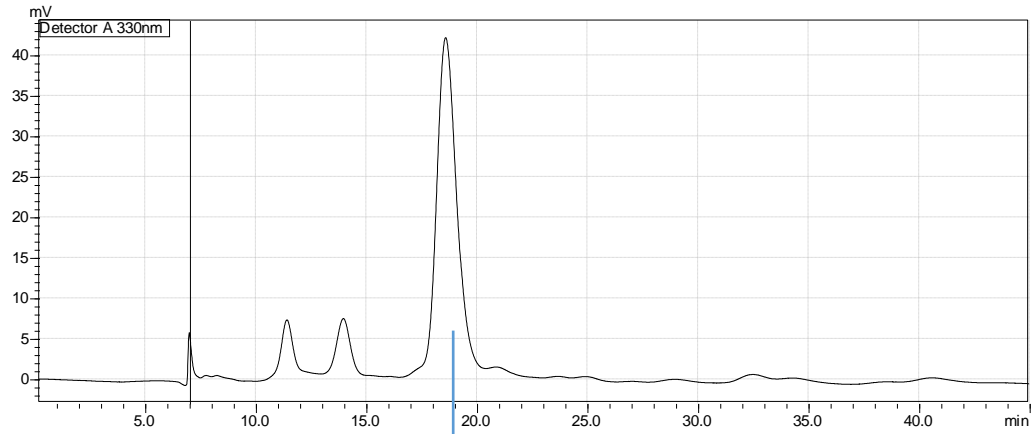

After C18 , then amino HPLC separation

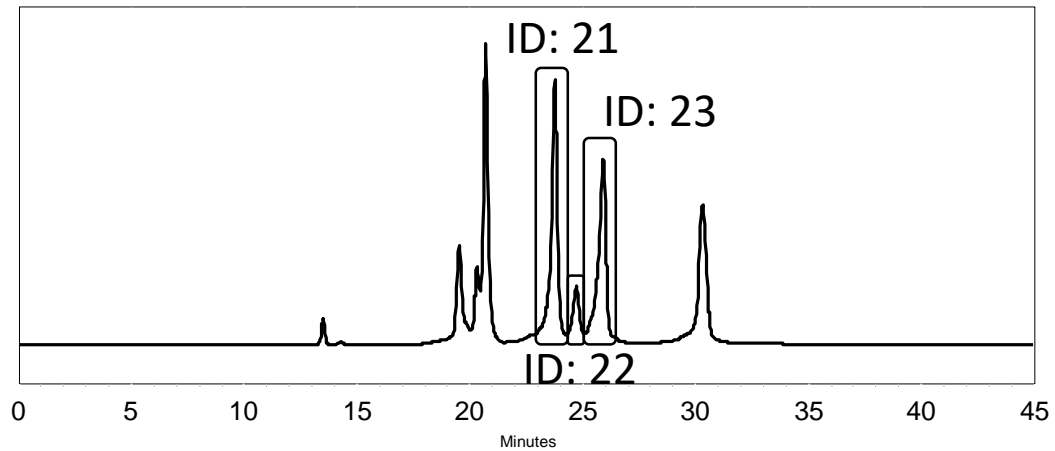

# M-F9 from WAX HPLC, then C18 HPLC

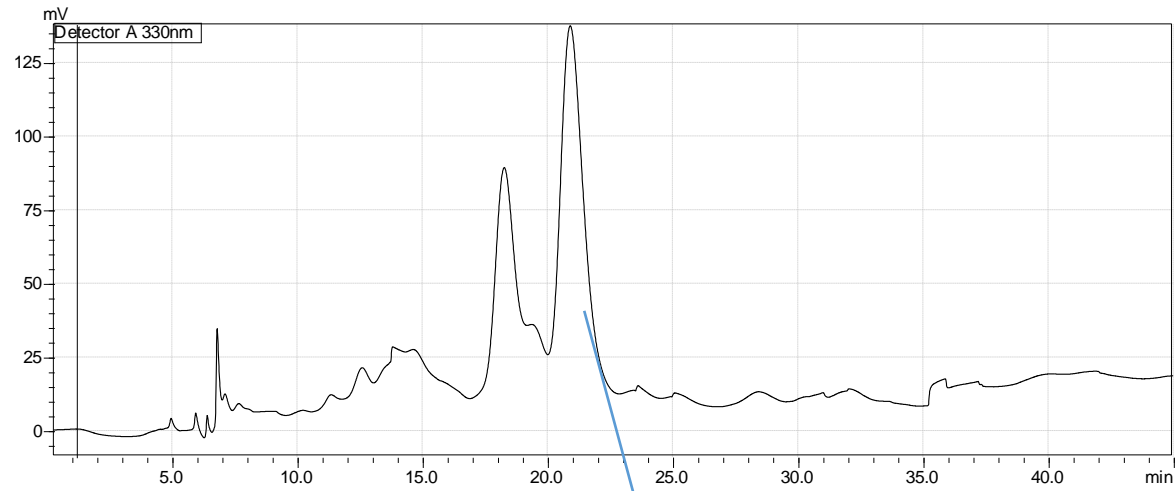

# After C18 , then amino HPLC separation

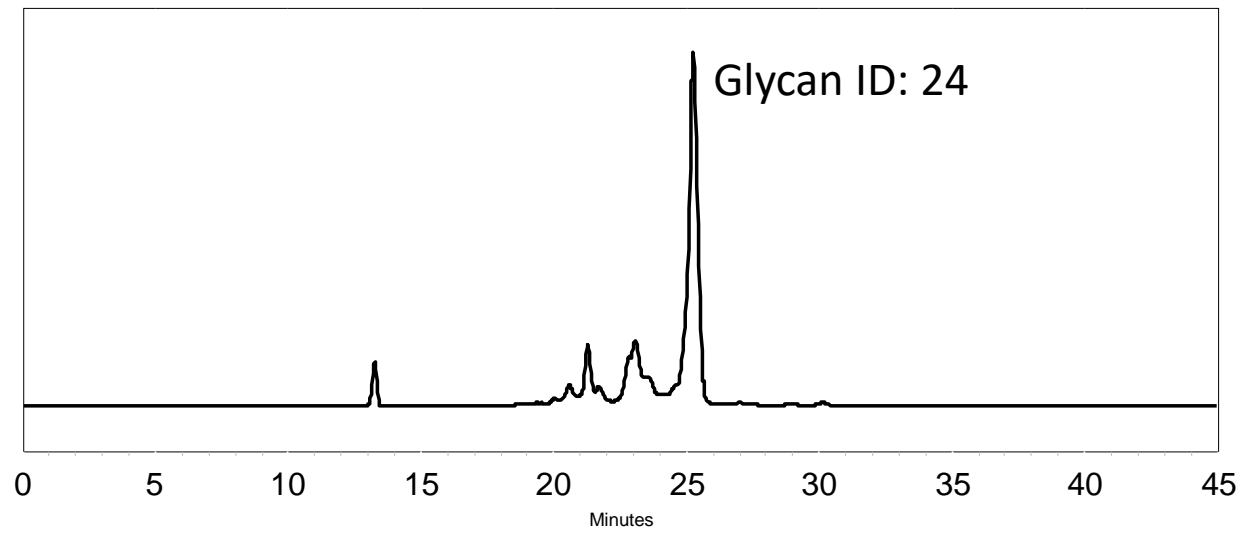



M-F10 from WAX HPLC, then C18 HPLC

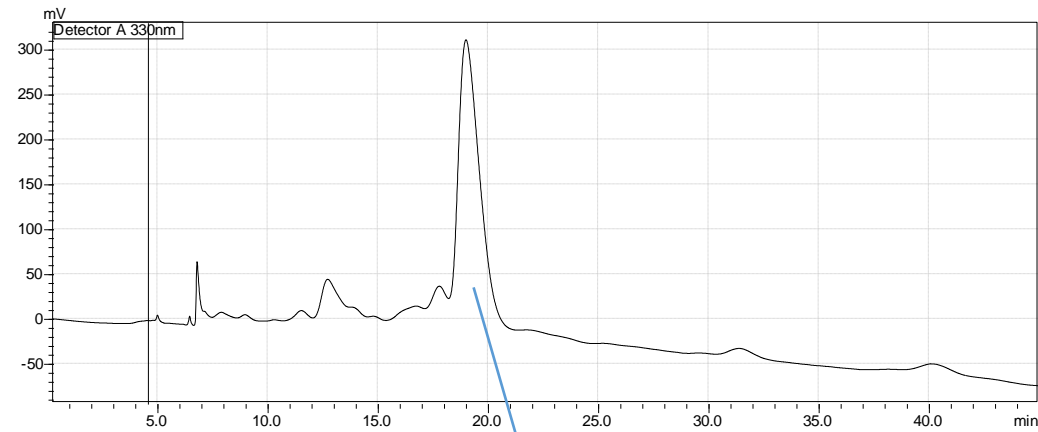

After C18 , then amino HPLC separation

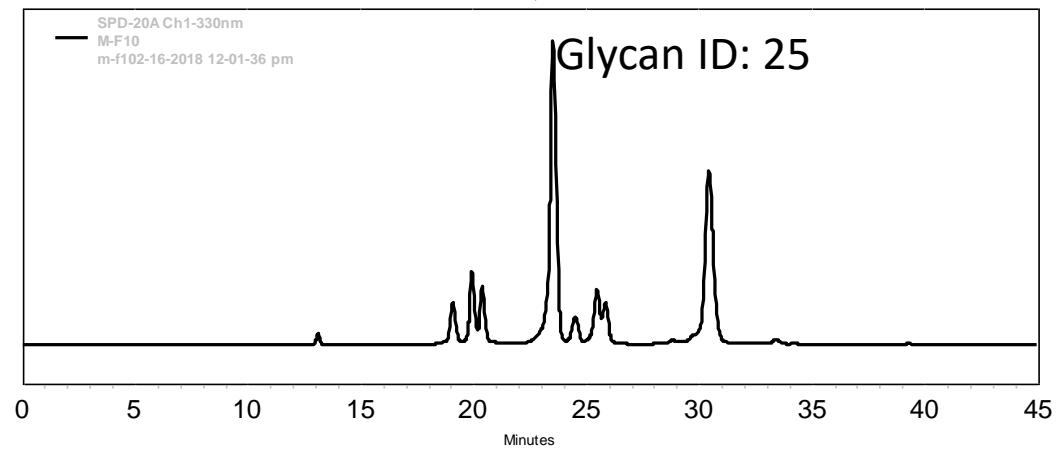

WAX Separation, di-sialic acids Portion

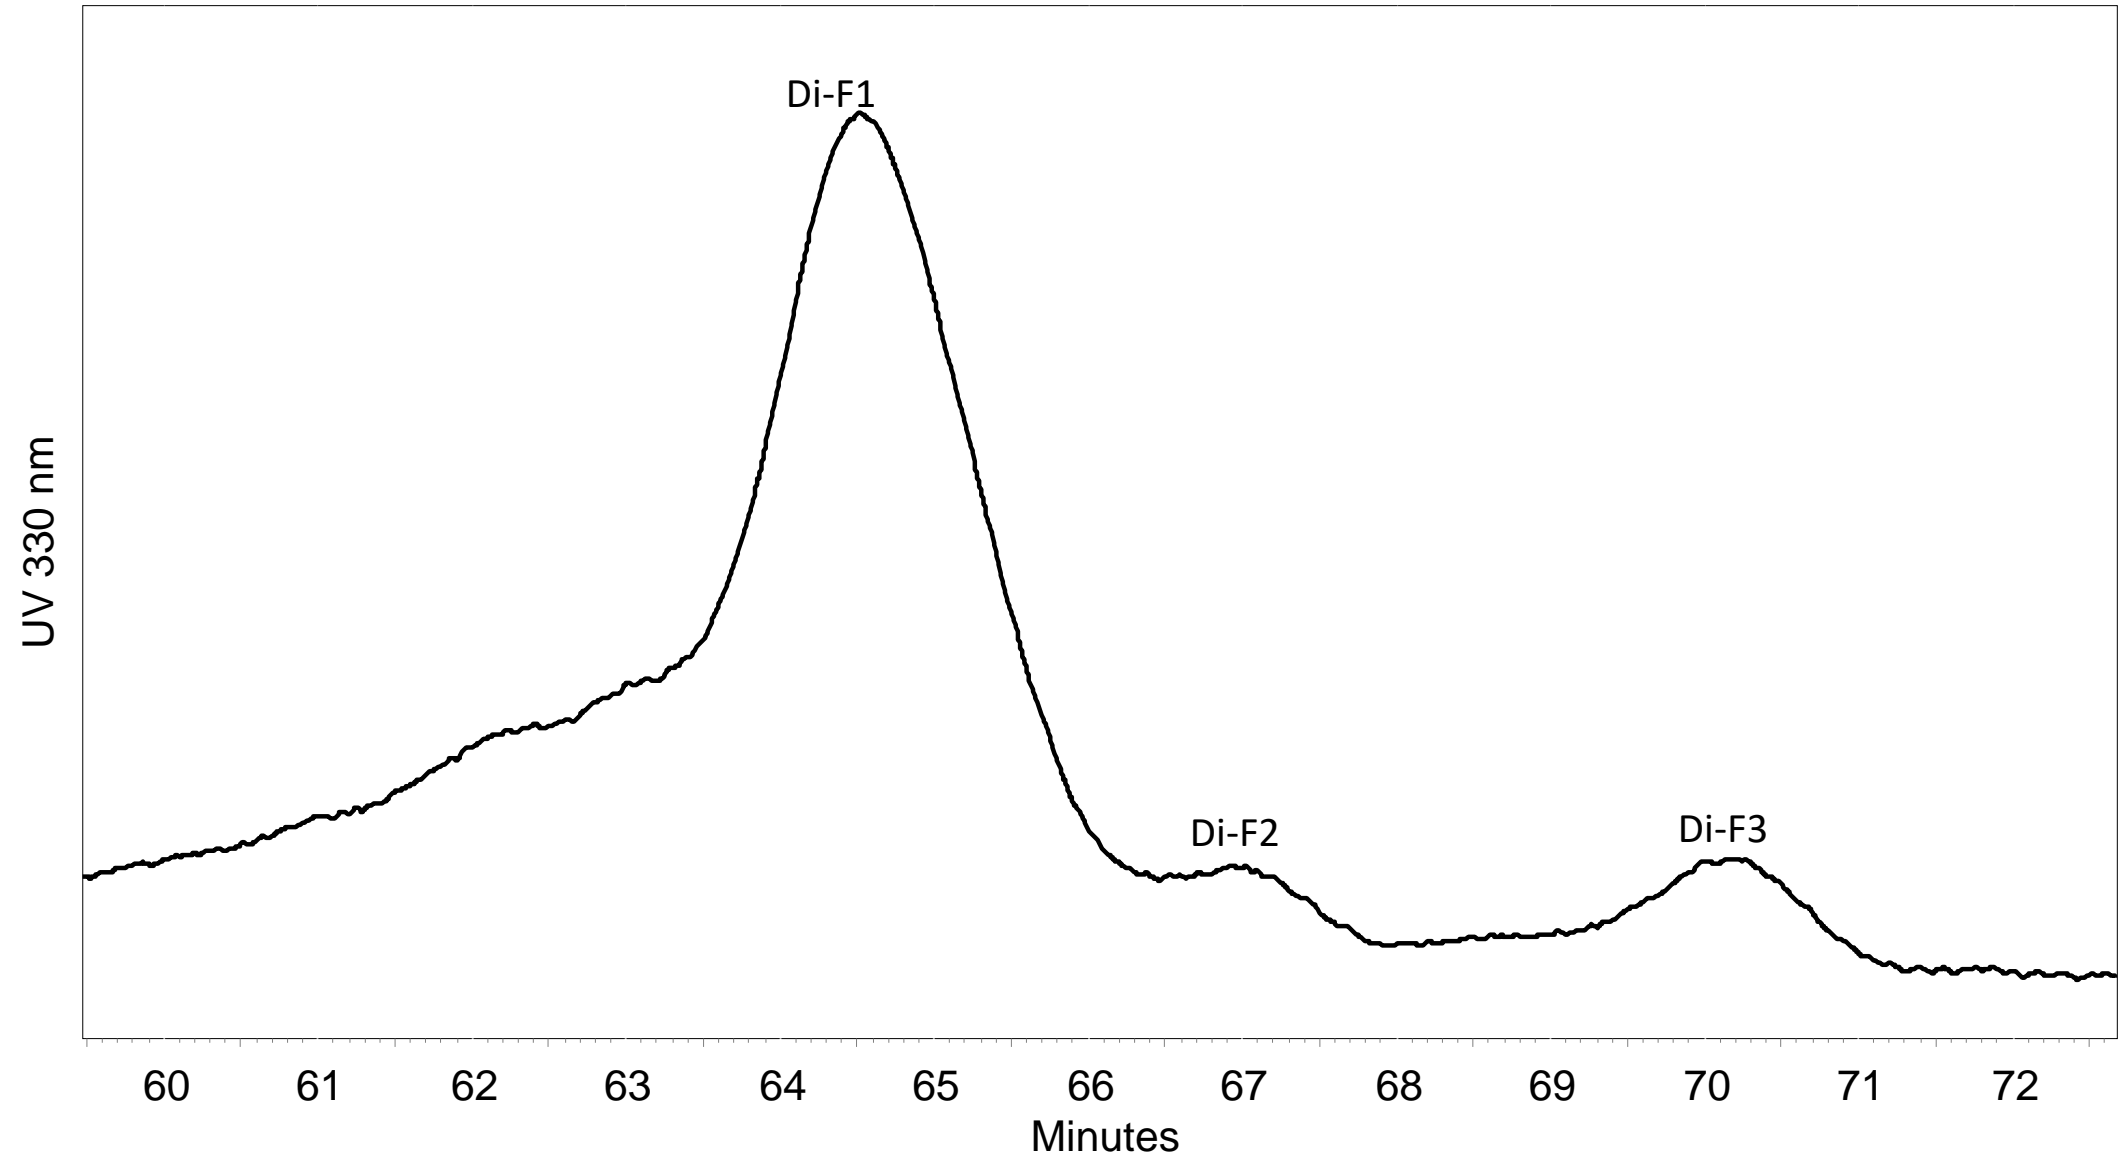

## Di-F1 from WAX HPLC, then C18 HPLC

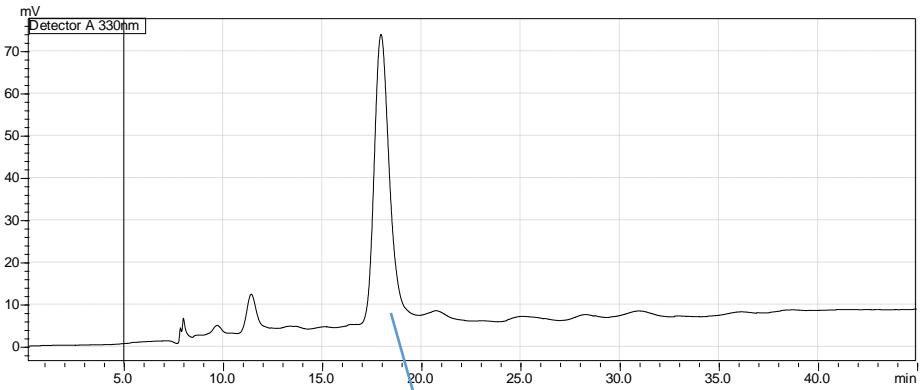

After C18 , then amino HPLC separation

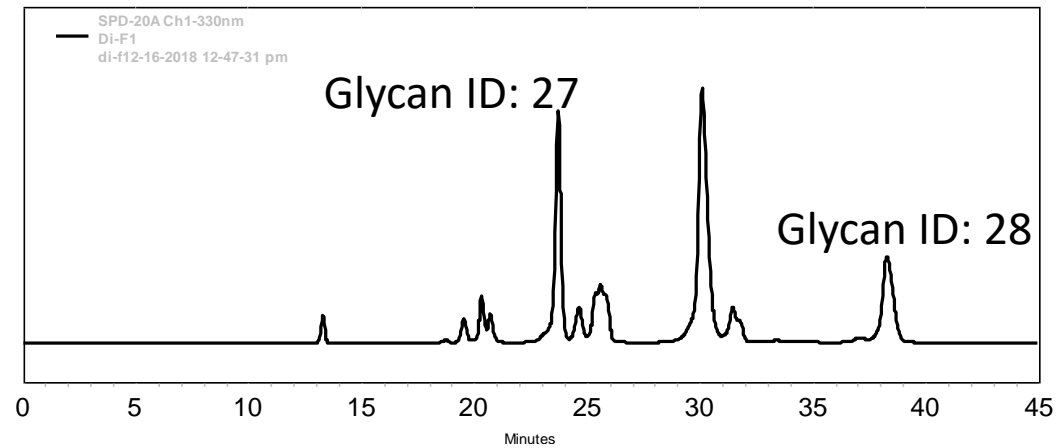

## Di-F2 from WAX HPLC, then C18 HPLC

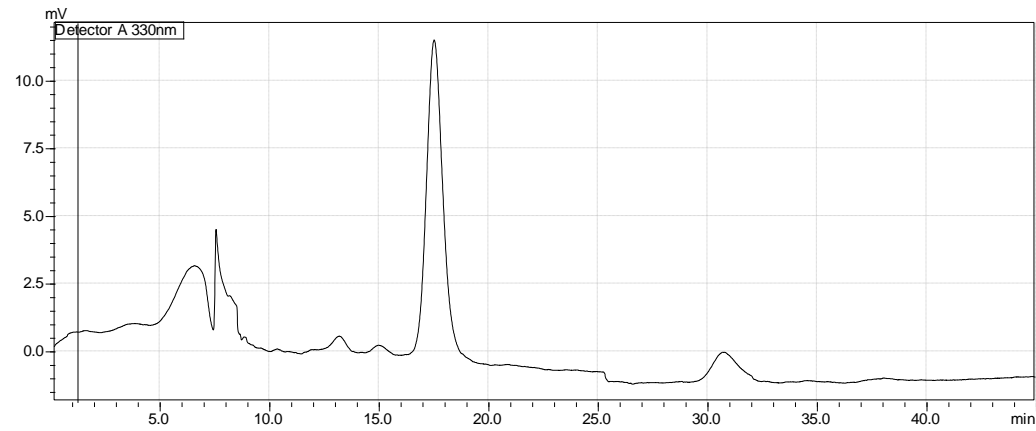

## After C18 , then amino HPLC separation

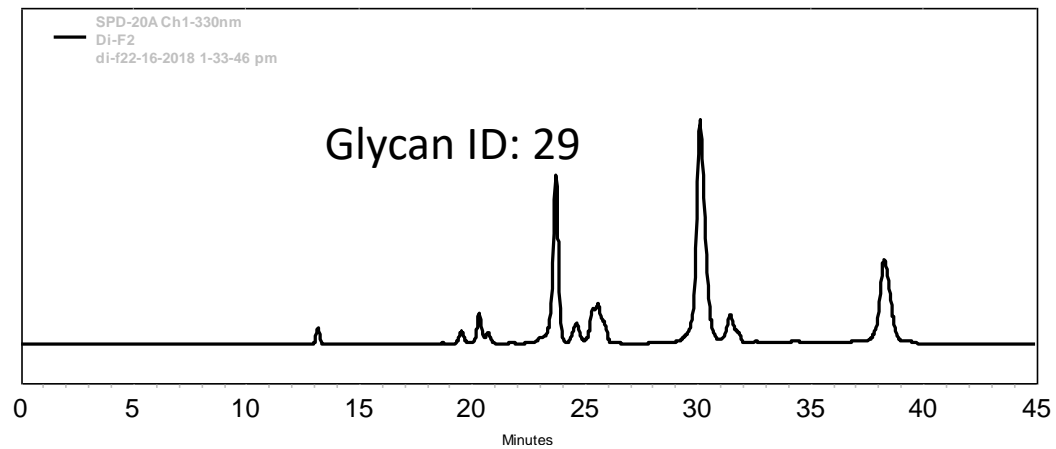

## Di-F3 from WAX HPLC, then C18 HPLC

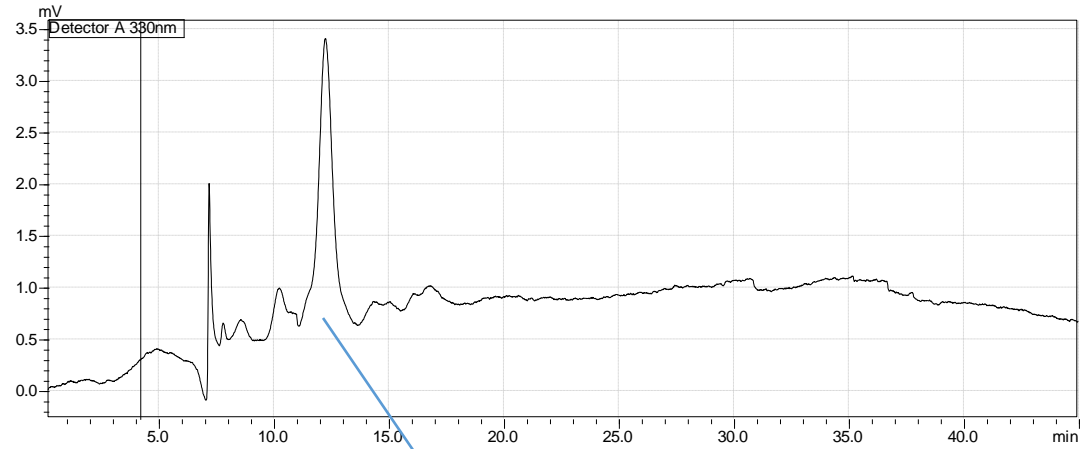

## After C18 , then amino HPLC separation

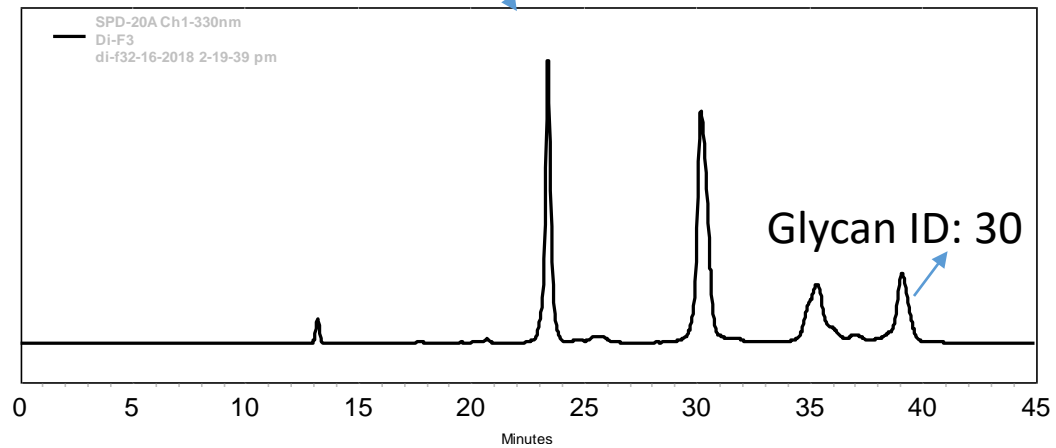

**Figure S2** Plant lectin binding on the glycan microarray of purified LNnT-AA (Chart ID 1-6, concentration: 200  $\mu$ M, 100  $\mu$ M, 50  $\mu$ M, 25  $\mu$ M, 10  $\mu$ M, 5  $\mu$ M, respectively and same below) and LNnT-AEAB (Chart ID 7-12), 2'-FL-AA (Chart ID 13-18), 2'-FL-AEAB (Chart ID 19-24). Error bars represent standard deviation of 6 replicates. **a)** binding of *Aleuria aurantia* lectin; **b)** binding of *Erythrina cristagalli* lectin.

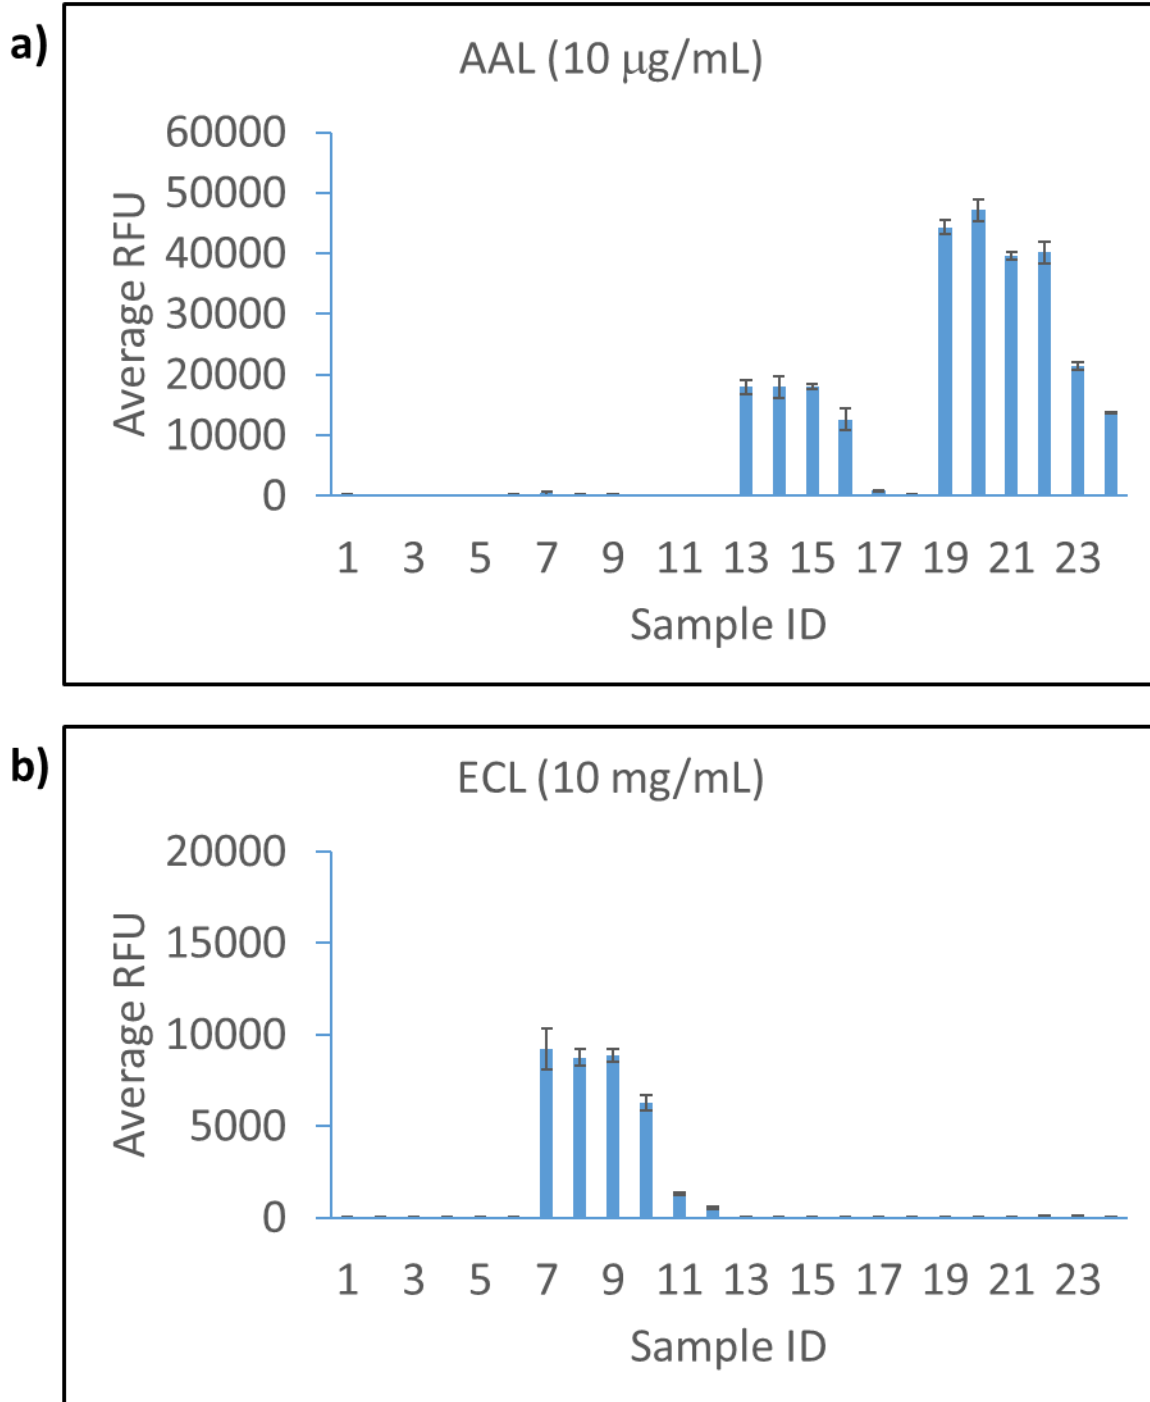

**Figure S3:** Click chemistry of LNnT-AZAB with propargylamine

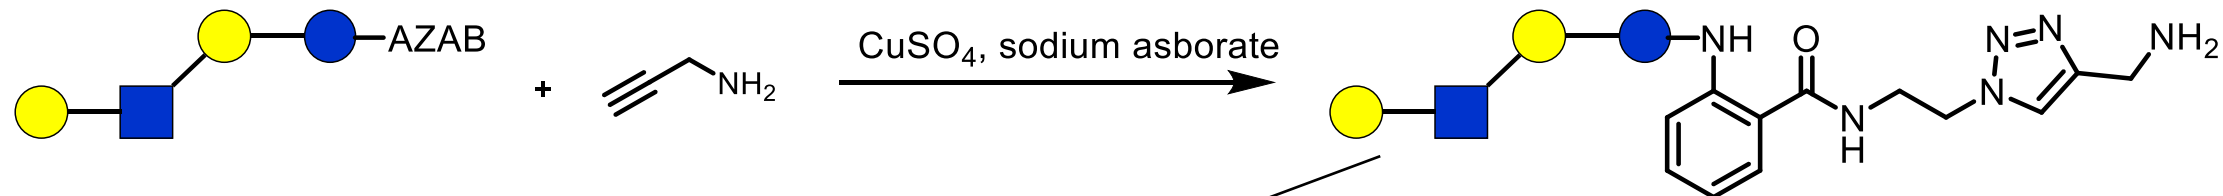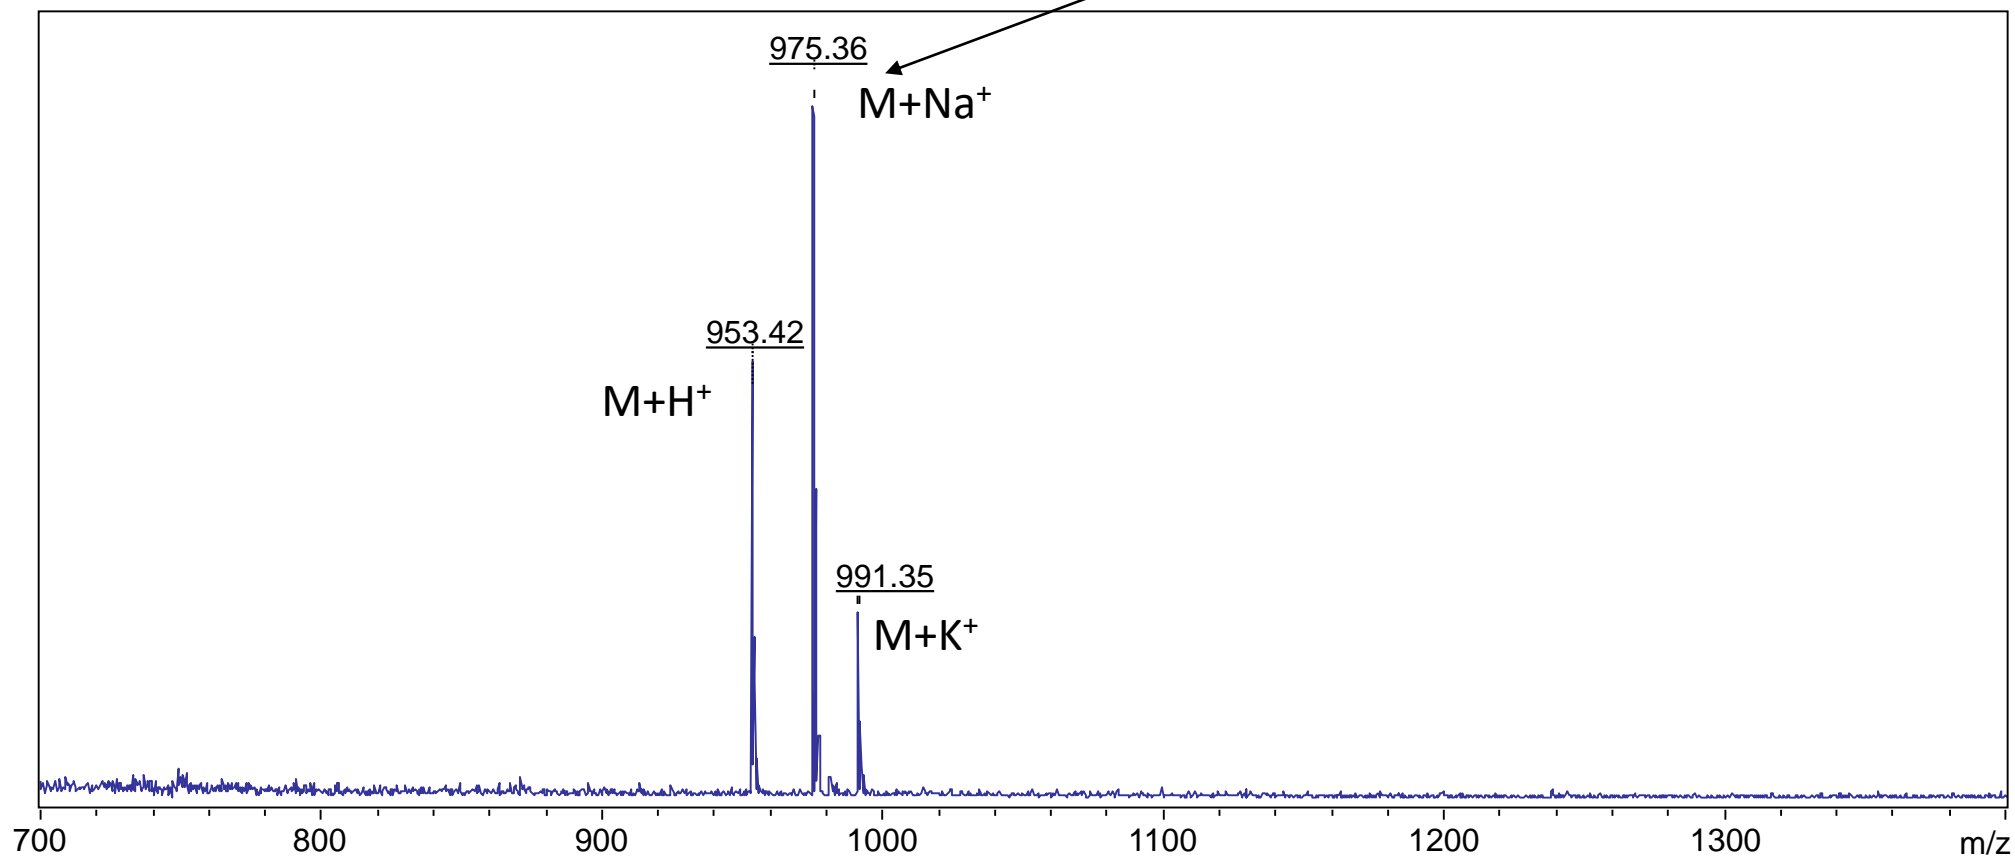

**Table S1** Summary of purified chicken egg N-glycan-AA conjugates compositions for conversion to glycan-AEAB conjugates.

| Glycan ID | Structure Composition |
|-----------|-----------------------|
| 1         | H4N8                  |
| 2         | H3N7                  |
| 3         | H5N7                  |
| 4         | H3N8                  |
| 5         | H3N7                  |
| 6         | H3N7                  |
| 7         | H4N8                  |
| 8         | H5N7                  |
| 9         | H5N5                  |
| 10        | H3N7                  |
| 11        | H9N2                  |
| 12        | H4N4                  |
| 13        | H4N4                  |
| 14        | H3N5                  |
| 15        | H7N2                  |
| 16        | H4N8                  |
| 17        | H5N5                  |
| 18        | H4N5                  |
| 19        | H4N6                  |
| 20        | H5N5                  |
| 21        | H5N4                  |
| 22        | H5N4Sia1              |
| 23        | H6N3                  |
| 24        | H8N2                  |
| 25        | H4N4                  |
| 26        | H5N7                  |
| 27        | H5N4                  |
| 28        | H5N4Sia2              |
| 29        | H5N4                  |
| 30        | H6N3                  |



**Table S2** Summary tables for microarray and lectin binding data

| Biotin-AAL(10ug/ml), Cy5-SA (1ug/ml), LNnT & 2'-FL |               |          |          |          |
|----------------------------------------------------|---------------|----------|----------|----------|
| Sample ID                                          | Detail        | Average  | STDEV    | %CV      |
| 1                                                  | LNnT-AA-200   | 227.5    | 134.2498 | 59.01089 |
| 2                                                  | LNnT-AA-100   | 67       | 15.18771 | 22.66823 |
| 3                                                  | LNnT-AA-50    | 77       | 18.38478 | 23.87633 |
| 4                                                  | LNnT-AA-25    | 73.5     | 5.446712 | 7.410492 |
| 5                                                  | LNnT-AA-10    | 56.25    | 5.737305 | 10.19965 |
| 6                                                  | LNnT-AA-5     | 146.25   | 130.0471 | 88.9211  |
| 7                                                  | LNnT-AEAB-200 | 383      | 349.5025 | 91.25392 |
| 8                                                  | LNnT-AEAB-100 | 195.25   | 97.16438 | 49.76409 |
| 9                                                  | LNnT-AEAB-50  | 97       | 90.10364 | 92.89035 |
| 10                                                 | LNnT-AEAB-25  | 68.25    | 12.44655 | 18.23671 |
| 11                                                 | LNnT-AEAB-10  | 48.5     | 6.244998 | 12.87628 |
| 12                                                 | LNnT-AEAB-5   | 93       | 27.98809 | 30.09472 |
| 13                                                 | 2FL-AA-200    | 17964.5  | 1107.589 | 6.165429 |
| 14                                                 | 2FL-AA-100    | 17956.25 | 1842.499 | 10.26105 |
| 15                                                 | 2FL-AA-50     | 18004    | 363.129  | 2.016935 |
| 16                                                 | 2FL-AA-25     | 12584.75 | 1766.956 | 14.04046 |
| 17                                                 | 2FL-AA-10     | 875.75   | 84.23133 | 9.618193 |
| 18                                                 | 2FL-AA-5      | 204.75   | 30.01527 | 14.65947 |
| 19                                                 | 2FL-AEAB-200  | 44347    | 1210.533 | 2.729685 |
| 20                                                 | 2FL-AEAB-100  | 47115.5  | 1800.935 | 3.822383 |
| 21                                                 | 2FL-AEAB-50   | 39536.5  | 677.8109 | 1.714393 |
| 22                                                 | 2FL-AEAB-25   | 40172    | 1745.578 | 4.34526  |
| 23                                                 | 2FL-AEAB-10   | 21427.25 | 659.005  | 3.075546 |
| 24                                                 | 2FL-AEAB-5    | 13703.5  | 123.2383 | 0.89932  |

| Biotin-ECL(10ug/ml), Cy5-SA (1ug/ml), LNnT & 2'-FL |               |         |       |     |
|----------------------------------------------------|---------------|---------|-------|-----|
| Sample ID                                          | Detail        | Average | STDEV | %CV |
| 1                                                  | LNnT-AA-200   | 77      | 3     | 3   |
| 2                                                  | LNnT-AA-100   | 70      | 8     | 12  |
| 3                                                  | LNnT-AA-50    | 51      | 4     | 7   |
| 4                                                  | LNnT-AA-25    | 43      | 5     | 11  |
| 5                                                  | LNnT-AA-10    | 28      | 2     | 8   |
| 6                                                  | LNnT-AA-5     | 26      | 2     | 7   |
| 7                                                  | LNnT-AEAB-200 | 9227    | 1107  | 12  |
| 8                                                  | LNnT-AEAB-100 | 8746    | 435   | 5   |
| 9                                                  | LNnT-AEAB-50  | 8863    | 364   | 4   |
| 10                                                 | LNnT-AEAB-25  | 6265    | 427   | 7   |
| 11                                                 | LNnT-AEAB-10  | 1304    | 60    | 5   |
| 12                                                 | LNnT-AEAB-5   | 553     | 53    | 10  |
| 13                                                 | 2FL-AA-200    | 42      | 6     | 14  |
| 14                                                 | 2FL-AA-100    | 39      | 4     | 10  |
| 15                                                 | 2FL-AA-50     | 54      | 15    | 27  |
| 16                                                 | 2FL-AA-25     | 31      | 2     | 5   |
| 17                                                 | 2FL-AA-10     | 37      | 5     | 14  |
| 18                                                 | 2FL-AA-5      | 36      | 3     | 8   |
| 19                                                 | 2FL-AEAB-200  | 71      | 4     | 6   |
| 20                                                 | 2FL-AEAB-100  | 61      | 3     | 5   |
| 21                                                 | 2FL-AEAB-50   | 44      | 8     | 18  |
| 22                                                 | 2FL-AEAB-25   | 65      | 21    | 33  |
| 23                                                 | 2FL-AEAB-10   | 83      | 31    | 37  |
| 24                                                 | 2FL-AEAB-5    | 47      | 15    | 31  |

| Biotin ConA (1 ug/ml)_Cy5 SA (1ug/ml), Egg N-Glycans |           |         |       |     |
|------------------------------------------------------|-----------|---------|-------|-----|
| Structure Composition                                | Glycan ID | Average | STDEV | %CV |
| H4N8                                                 | 1         | 388     | 54    | 14  |
| H3N7                                                 | 2         | 63      | 10    | 16  |
| H5N7                                                 | 3         | 52      | 12    | 24  |
| H3N8                                                 | 4         | 38      | 5     | 12  |
| H3N7                                                 | 5         | 25      | 1     | 4   |
| H3N7                                                 | 6         | 39      | 3     | 6   |
| H4N8                                                 | 7         | 31      | 4     | 13  |
| H5N7                                                 | 8         | 31      | 9     | 30  |
| H5N5                                                 | 9         | 15783   | 1952  | 12  |
| H3N7                                                 | 10        | 2479    | 378   | 15  |
| H9N2                                                 | 11        | 12666   | 1755  | 14  |
| H4N4                                                 | 12        | 5353    | 2074  | 39  |
| H4N4                                                 | 13        | 11429   | 364   | 3   |
| H3N5                                                 | 14        | 2306    | 844   | 37  |
| H7N2                                                 | 15        | 15586   | 249   | 2   |
| H4N8                                                 | 16        | 32      | 4     | 11  |
| H5N5                                                 | 17        | 23      | 3     | 13  |
| H4N5                                                 | 18        | 34      | 6     | 19  |
| H4N6                                                 | 19        | 167     | 4     | 2   |
| H5N5                                                 | 20        | 56      | 22    | 39  |
| H5N4                                                 | 21        | 8228    | 473   | 6   |
| H5N4Sia1                                             | 22        | 8300    | 438   | 5   |
| H6N3                                                 | 23        | 19413   | 1292  | 7   |
| H8N2                                                 | 24        | 15246   | 1511  | 10  |
| H4N4                                                 | 25        | 15093   | 1762  | 12  |
| H5N7                                                 | 26        | 3193    | 203   | 6   |
| H5N4                                                 | 27        | 3743    | 1019  | 27  |
| H5N4Sia2                                             | 28        | 3401    | 680   | 20  |
| H5N4                                                 | 29        | 6057    | 575   | 10  |
| H6N3                                                 | 30        | 1529    | 379   | 25  |

| Biotin ECL (10 ug/ml)_Cy5 SA (1ug/ml), Egg N-Glycans |           |         |       |     |
|------------------------------------------------------|-----------|---------|-------|-----|
| Structure Composition                                | Glycan ID | Average | STDEV | %CV |
| H4N8                                                 | 1         | 8822    | 0     | 4   |
| H3N7                                                 | 2         | 81      | 15    | 19  |
| H5N7                                                 | 3         | 11896   | 1366  | 11  |
| H3N8                                                 | 4         | 66      | 9     | 14  |
| H3N7                                                 | 5         | 77      | 10    | 13  |
| H3N7                                                 | 6         | 75      | 3     | 4   |
| H4N8                                                 | 7         | 9647    | 1149  | 12  |
| H5N7                                                 | 8         | 56      | 8     | 13  |
| H5N5                                                 | 9         | 72      | 13    | 18  |
| H3N7                                                 | 10        | 68      | 9     | 13  |
| H9N2                                                 | 11        | 48      | 2     | 5   |
| H4N4                                                 | 12        | 10203   | 434   | 4   |
| H4N4                                                 | 13        | 15441   | 1295  | 8   |
| H3N5                                                 | 14        | 31      | 6     | 21  |
| H7N2                                                 | 15        | 53      | 3     | 5   |
| H4N8                                                 | 16        | 14915   | 479   | 3   |
| H5N5                                                 | 17        | 597     | 116   | 19  |
| H4N5                                                 | 18        | 9073    | 575   | 6   |
| H4N6                                                 | 19        | 20723   | 2294  | 11  |
| H5N5                                                 | 20        | 11871   | 2284  | 19  |
| H5N4                                                 | 21        | 16711   | 1045  | 6   |
| H5N4Sia1                                             | 22        | 11355   | 158   | 1   |
| H6N3                                                 | 23        | 13297   | 1468  | 11  |
| H8N2                                                 | 24        | 22      | 5     | 21  |
| H4N4                                                 | 25        | 16185   | 1779  | 11  |
| H5N7                                                 | 26        | 10325   | 903   | 9   |
| H5N4                                                 | 27        | 9144    | 1107  | 12  |
| H5N4Sia2                                             | 28        | 33      | 4     | 12  |
| H5N4                                                 | 29        | 10959   | 1846  | 17  |
| H6N3                                                 | 30        | 5638    | 649   | 12  |

| Biotin RCA1 (10 ug/ml)_Cy5 SA (1ug/ml), Egg N-Glycans |           |         |       |     |
|-------------------------------------------------------|-----------|---------|-------|-----|
| Structure Composition                                 | Glycan ID | Average | STDEV | %CV |
| H4N8                                                  | 1         | 16928   | 543   | 3   |
| H3N7                                                  | 2         | 70      | 12    | 18  |
| H5N7                                                  | 3         | 18674   | 517   | 3   |
| H3N8                                                  | 4         | 54      | 4     | 8   |
| H3N7                                                  | 5         | 64      | 10    | 15  |
| H3N7                                                  | 6         | 46      | 7     | 15  |
| H4N8                                                  | 7         | 22397   | 937   | 4   |
| H5N7                                                  | 8         | 59      | 8     | 13  |
| H5N5                                                  | 9         | 52      | 6     | 12  |
| H3N7                                                  | 10        | 70      | 9     | 13  |
| H9N2                                                  | 11        | 64      | 5     | 8   |
| H4N4                                                  | 12        | 20624   | 2133  | 10  |
| H4N4                                                  | 13        | 24405   | 957   | 4   |
| H3N5                                                  | 14        | 30      | 7     | 24  |
| H7N2                                                  | 15        | 78      | 3     | 4   |
| H4N8                                                  | 16        | 24201   | 204   | 1   |
| H5N5                                                  | 17        | 2397    | 849   | 35  |
| H4N5                                                  | 18        | 17031   | 405   | 2   |
| H4N6                                                  | 19        | 20513   | 619   | 3   |
| H5N5                                                  | 20        | 20802   | 2336  | 11  |
| H5N4                                                  | 21        | 23873   | 2348  | 10  |
| H5N4Sia1                                              | 22        | 28289   | 673   | 2   |
| H6N3                                                  | 23        | 23348   | 450   | 2   |
| H8N2                                                  | 24        | 30      | 3     | 11  |
| H4N4                                                  | 25        | 20690   | 2936  | 14  |
| H5N7                                                  | 26        | 19433   | 2362  | 12  |
| H5N4                                                  | 27        | 17453   | 2238  | 13  |
| H5N4Sia2                                              | 28        | 22464   | 2390  | 11  |
| H5N4                                                  | 29        | 20664   | 4836  | 23  |
| H6N3                                                  | 30        | 13742   | 1796  | 13  |

| Biotin SNA (10 ug/ml)_Cy5 SA (1ug/ml), Egg N-Glycans |           |         |          |          |
|------------------------------------------------------|-----------|---------|----------|----------|
| Structure Composition                                | Glycan ID | Average | STDEV    | %CV      |
| H4N8                                                 | 1         | 178.5   | 26.63957 | 14.92413 |
| H3N7                                                 | 2         | 39.75   | 9.945686 | 25.02059 |
| H5N7                                                 | 3         | 28.75   | 0.5      | 1.73913  |
| H3N8                                                 | 4         | 33.25   | 3.685557 | 11.08438 |
| H3N7                                                 | 5         | 20.25   | 2.986079 | 14.74607 |
| H3N7                                                 | 6         | 25.75   | 4.924429 | 19.124   |
| H4N8                                                 | 7         | 25.75   | 2.217356 | 8.61109  |
| H5N7                                                 | 8         | 24      | 3.162278 | 13.17616 |
| H5N5                                                 | 9         | 24.75   | 2.061553 | 8.329506 |
| H3N7                                                 | 10        | 19.75   | 2.061553 | 10.43824 |
| H9N2                                                 | 11        | 43.25   | 3.5      | 8.092486 |
| H4N4                                                 | 12        | 17.25   | 4.193249 | 24.30869 |
| H4N4                                                 | 13        | 43.5    | 9.036961 | 20.77462 |
| H3N5                                                 | 14        | 23      | 0.816497 | 3.549985 |
| H7N2                                                 | 15        | 249.5   | 54.75095 | 21.94427 |
| H4N8                                                 | 16        | 27.75   | 4.112988 | 14.82158 |
| H5N5                                                 | 17        | 21      | 4.546061 | 21.64791 |
| H4N5                                                 | 18        | 22.75   | 2.217356 | 9.746619 |
| H4N6                                                 | 19        | 31.5    | 9.983319 | 31.69308 |
| H5N5                                                 | 20        | 25.25   | 3.685557 | 14.59627 |
| H5N4                                                 | 21        | 20.75   | 1.892969 | 9.122744 |
| H5N4Sia1                                             | 22        | 10711   | 853.4112 | 7.967615 |
| H6N3                                                 | 23        | 21.75   | 3.593976 | 16.52403 |
| H8N2                                                 | 24        | 52      | 16.83251 | 32.37021 |
| H4N4                                                 | 25        | 24.5    | 2.516611 | 10.27188 |
| H5N7                                                 | 26        | 27.5    | 2.380476 | 8.656277 |
| H5N4                                                 | 27        | 23      | 3.91578  | 17.02513 |
| H5N4Sia2                                             | 28        | 8749.5  | 832.8587 | 9.518929 |
| H5N4                                                 | 29        | 22.75   | 0.5      | 2.197802 |
| H6N3                                                 | 30        | 22.25   | 4.5      | 20.22472 |
